# Supplementary material
Source: PubMed Central journal article supplement (PMC3877825)
Supplement: supp_tpc.113.115485_tpc115485Supplemental.pdf [file supp_tpc.113.115485_tpc115485Supplemental.pdf]

## Supplementary Figures

**Supplemental Figure 1.** Quantitation of Co-Amplified PCR Products and Coverage Plots for NMD Candidate Genes Displayed in Figure 1.

**(A)** Ratio of splicing variants derived from genes *At5g53180* and *At4g36960* as determined by Bioanalyzer quantitation of co-amplified cDNA products (mean values +SD, n = 3).

**(B)** Gene models showing the alternatively spliced regions. For further details of gene models refer to legend of Figure 1.

**(C)** Coverage plots showing aligned reads from RNA-seq data for the regions displayed in **(B)**. Reads in the altered regions are shown in black, other reads in gray.

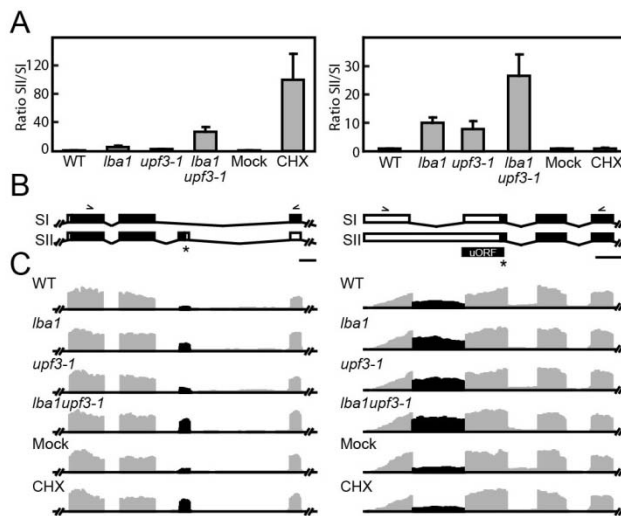

**Supplemental Figure 2.** Gene Models, Coverage Plots, and Splice Ratio Analyses for AS Events Randomly Chosen for FDR Testing of Differential Testing *lba1 upf3-1* versus Wild Type.

**(A-I)** For each gene, partial gene model depicting the alternatively spliced region (top panel), representative coverage plots for control and NMD-impaired samples (middle panel), and, lower panel, either gel pictures showing coamplified RT-PCR products corresponding to splicing variants shown above and quantitation via Bioanalyzer **(A-H)**, or determination of splicing variant ratio via RT-qPCR **(I)**. Details of gene models as described in legend to Figure 1. Quantitative data are mean values of triplicates + SD, except CHX sample for *At1g28660* **(G)**, for which a duplicate has been analyzed (individual data points displayed as dots and mean value as bar). **(I)** Ratio determination based on RT-qPCR analysis of individual variants SI, SII, and SIII. This randomly selected AS event referred to splice forms SII and SIII, while SI corresponds to the representative gene model in the TAIR10 annotation. Besides the ratio SIII/SII, ratios for either isoform relative to SI were determined, revealing that both SII and SIII increase upon NMD impairment and thus are NMD targets.

**(J)** RT-PCR aiming at coamplification of the two predicted splicing variants derived from *At2g27720* resulted only in a single band corresponding to SI.



**Supplemental Figure 3.** Venn Diagrams and Numbers of AS Events Changed upon NMD Impairment Using Different Stringency Cutoffs.

**(A-C)** Size proportional Venn diagrams of significantly altered AS events and gene numbers (in parentheses, left panel) and tables with the corresponding event and gene numbers and subgroups (right panel). Depicted are comparisons of *lba1 upf3-1*, single mutants and CHX treatment with cutoff values of  $p \leq 0.1$  for all datasets **(A)**,  $FDR \leq 0.1$  for all datasets **(B)**, and of *lba1 upf3-1* and CHX treatment ( $FDR \leq 0.1$ ) and the two single mutants with  $p \leq 0.1$  **(C)**, and Figure 3A). Asterisks provide information on statistical significance of the overlaps. Removed contradictory events had significant, opposite changes in two samples.

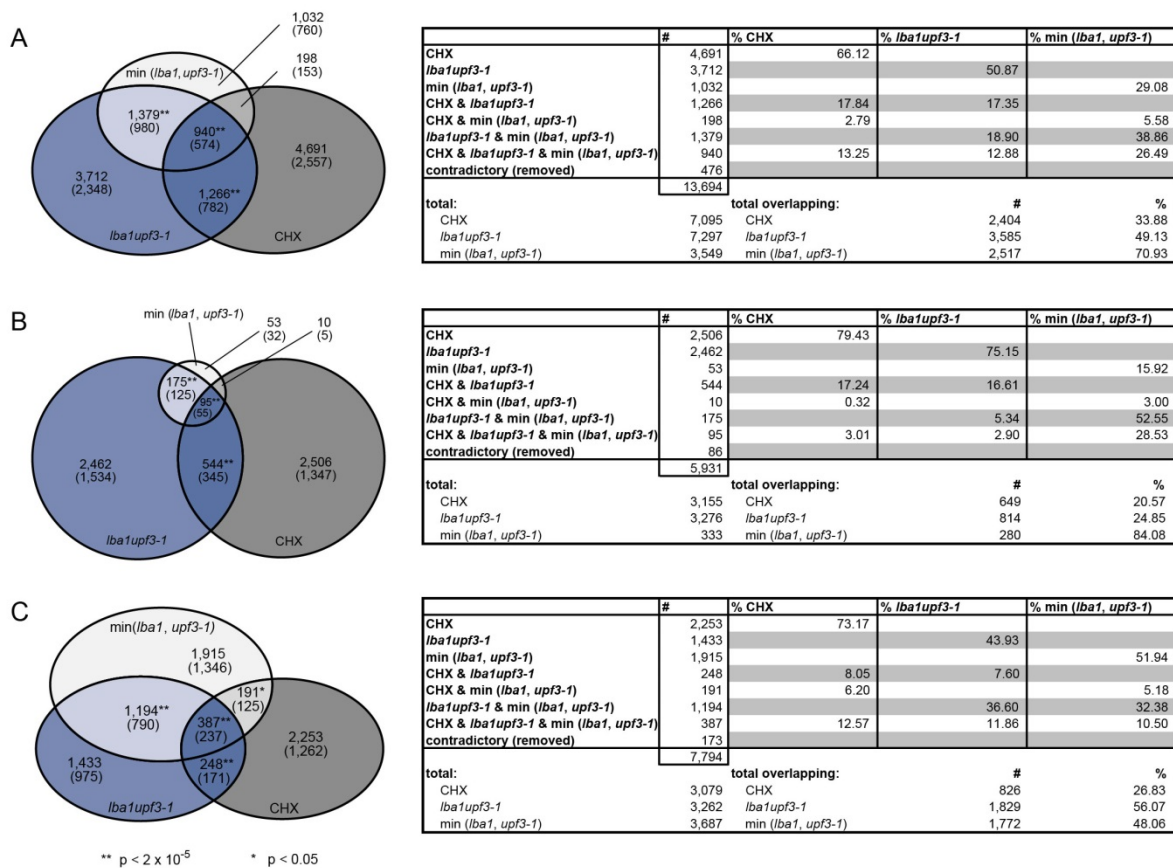

**Supplemental Figure 4.** Gel Pictures, Gene Models, and Complete Sets of Coverage Plots for the AS Events Shown in Figure 3D and Control Events not Linked to NMD.

**(A-D)** Alternative splicing events shown in Figure 3D. Upper panel shows representative gel pictures of RT-PCR products for *At1g11650* **(A)**, *At5g17550* **(B)**, *At1g58080* **(C)**, and *At2g30260* **(D)** used for quantitation (Figure 3D). “M” indicates DNA ladder in 100 bp increments. Bands corresponding to splicing variants SI and SII are indicated and the corresponding partial gene models are displayed below gel pictures. Details of gene models as described in legend to Figure 1. Lower panel shows coverage plots derived from RNA-Seq data for representative samples.

**(E, F)** Alternative splicing events of genes *At3g17609* and *At3g23280* leading to two major splice forms, both of which have been shown to encode a protein (Sibout et al., 2006; Carvalho et al., 2012), and thus are not expected to be linked to NMD. Setup and details of display as described for **(A-D)**.

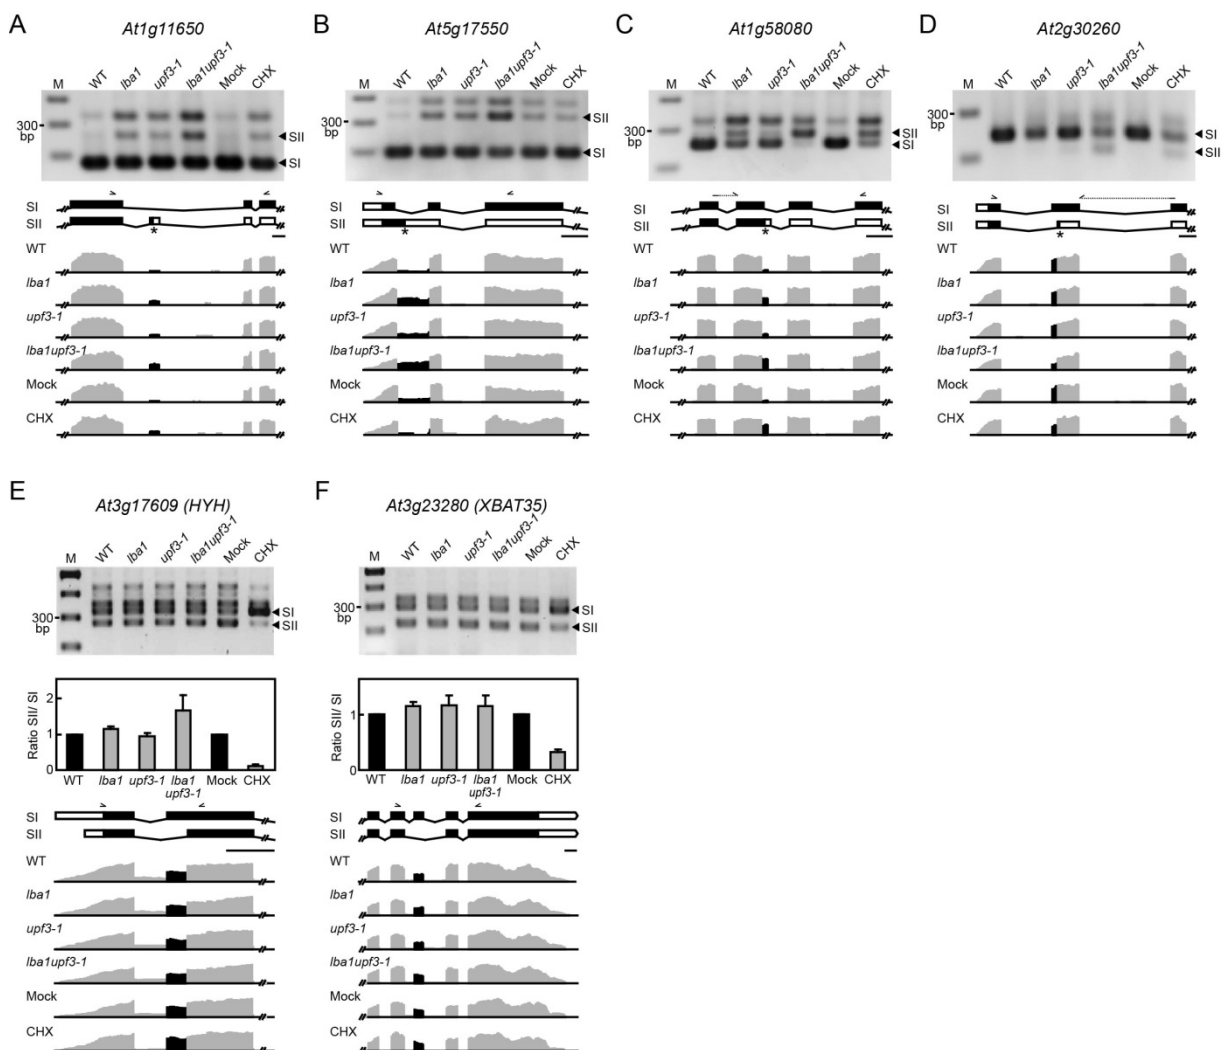

**Supplemental Figure 5.** Correlation of 3' UTR Lengths in Double Mutant and Wild Type Isoforms with the Predicted Significance of Differential Transcript Expression.

All events tested as differentially expressed for wild type vs. *lba1 upf3-1* having a p-value < 1 were sorted by p-value and displayed along the x-axis. Red and green dots show 3' UTR lengths of *lba1 upf3-1* and wild type isoforms, respectively. Linear regression lines of the 3' UTR representing the tendency along the significance axis are depicted in black solid and dashed for the double mutant and wild type isoforms, respectively.

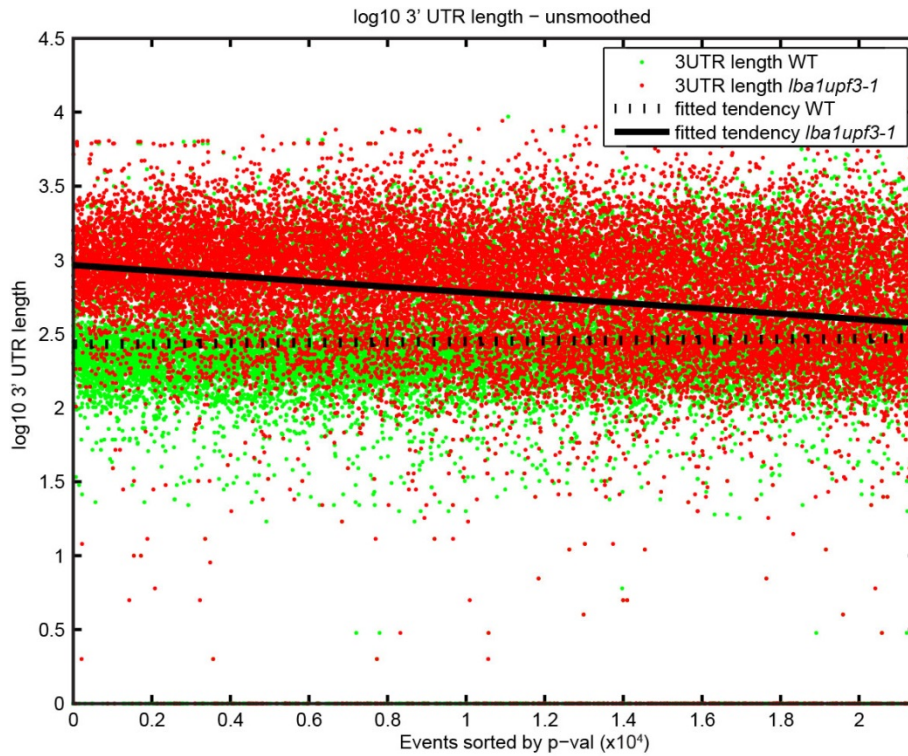

**Supplemental Figure 6.** Gene Models, Coverage Plots, and Representative Gel Pictures for the AS Events Shown in Figures 5B and 5C.

**(A, B)** Tested candidates belong to the GO terms “signaling” **(A)** and “posttranslational protein modification” **(B)**. Display details as described in previous legends.

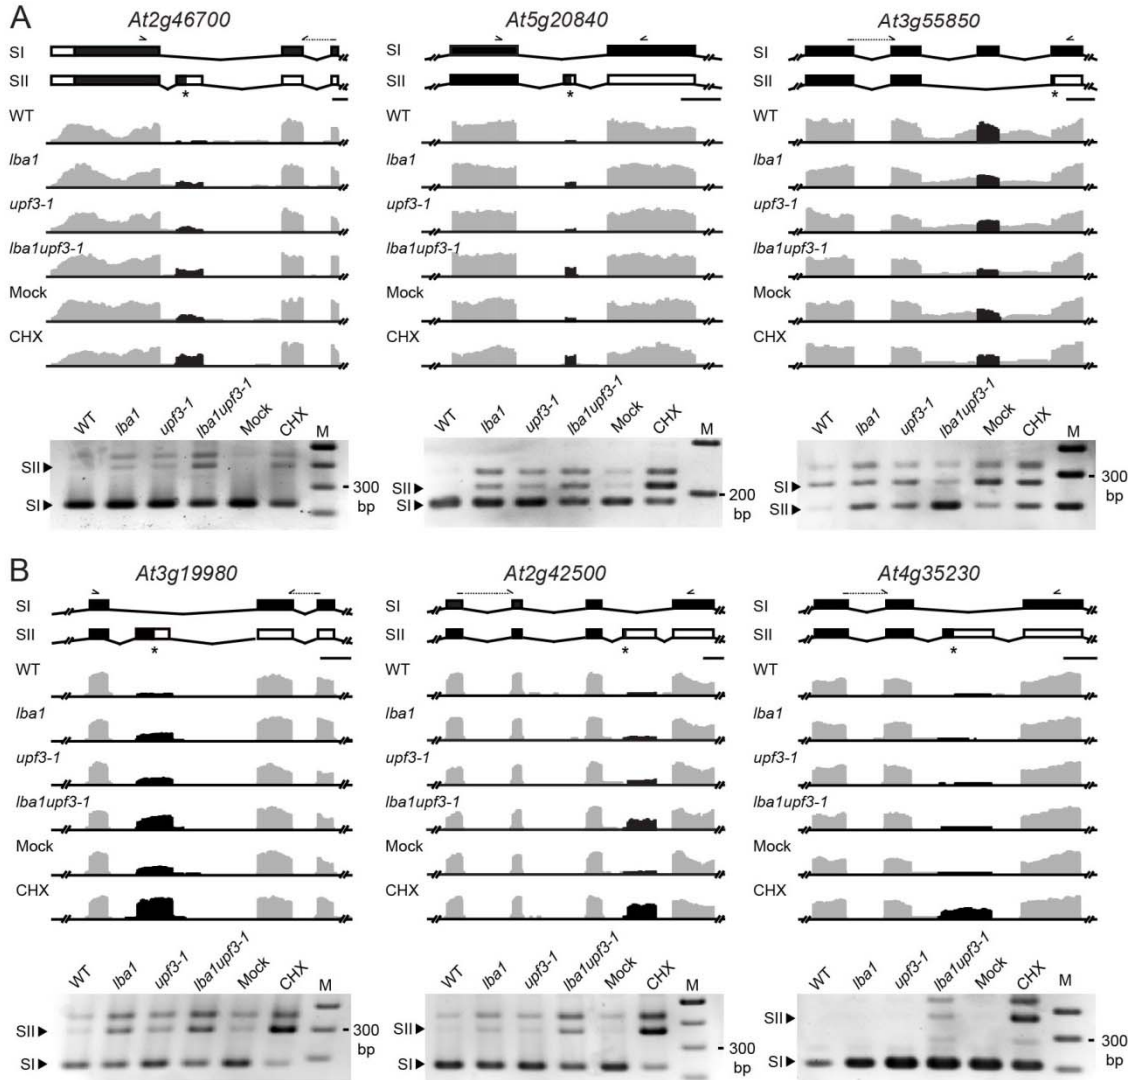

**Supplemental Figure 7.** Gel Pictures and Quantification of Transcript Variants for AS Events Shown in Figure 6 under Osmotic Stress Conditions.

RT-PCR analysis and quantification as described in legend to Figure 6. Two biological replicates (Rep1 and Rep2) have been analyzed and ratios of SII/SI are normalized to the corresponding mock samples.

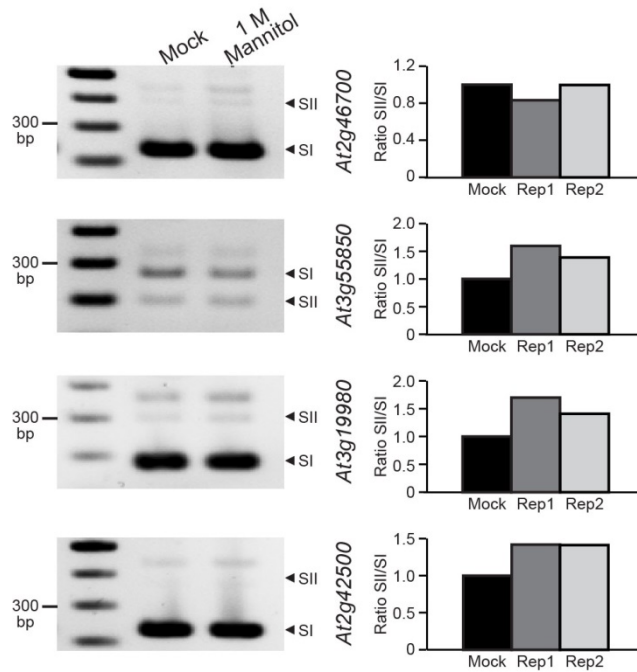



**Supplemental Figure 8.** Determination of Full-Length Sequences for Two of the Identified, Transcribed Intergenic Regions using RACE.

An intronic sequence is depicted in yellow, the longest putative ORF for each of the two intergenic regions is marked in red (predicted start and stop codons are in bold) and experimentally determined 5' and 3' ends are boxed in blue. Based on the RACE procedure, transcripts from both intergenic regions contain a 5' cap structure and a polyA tail. Furthermore, transcripts from both loci are derived from the minus strand.

**Intergenic region 869**

5' - **A**CGGT AGGAAGACAA AGTGGACCAT AA**ATGGCTAC** AAAGATATCA CATTAGTTT  
 CTCTCTTTT GTCTTTACTT CTTCTACTTC TATTTATCTC CTCTCAAGTT GGATTCACAG  
 AAGCCAAACG CGACGAAC**GT** TAGTATTTGC ACTCATTTTT TATTTATTGT CATGGTGCAA  
 ATGTTCAGAT GTATATTTTC AATTGATTCT TTGATTGTAT ATTTAATGGT TGCAAATTAT  
 TTAATGAAAC AATATCTTCA ATATTGTTAT CAG**GTAAAAA** GATGTCGTCT CCACCAATTC  
 CATCTCCACT AATTCCGTCT CCACCAATTC CTCCTCCTCC CCTCGTTTT TATGTACCTC  
 CTTCAAATC CCGCAGAGGA AAAGGCCAT **AA**ACAAATTG AGTAAAAGGC TCATCAAGAA  
 AAATTATTAA TCATATATGG TTTCATACAT GTATTTGTAC TCACTTTAAT AATTCTATTT  
 GATTATATAA ATAAATGATT GGTTTTT**C** - 3'

**Intergenic region 881**

5' - **A**TGAC AAAACTGAAC TAAACCGGTT AC**A**TATTGAA ATTCTAATAT CTGATCATAG  
 AACACAATTG AAGACGCCGT CCAATGTGAG CAGATTCTCG TCGGAACAGG ACATCCAATG  
 AACCTGGGCG ACGTGAGCTG **ATGATGATG** ATTTTCCAAG ATCCGCTGTC ATCCCACCAC  
 TATATAGCCG TTTTGAGAAG GAAGAAGATA TATGATATTG TCATTGTCTGA GGAGATACTT  
 GTTCGATCGT **GA**GAGAGAGA AATACTAAGG AGTAAAAAAT AGACCTTCGA TGGTGGCTCA  
 GCTCGCCGAA CCGGAGTCTA CCTCCCCTAT CGACAAAGAT TCCATGAAAT CTTATGAATC  
 TTCGGTCCCT TGATCAAATT CTTGTCTCTG TTATTTTCAT CTTAGATCTC CGTCTTCTAC  
 TATGTATTAC TACTACTGCCG GTAGAACTCT TATCGTCGGT GTGAGACTAA AGCTTCTTTT  
 CTCCACTAAT ACAACATATT ACAGTTGAAG AACTATGAGT CTTTAAATCC TCATCATCAT  
 CCAAATCGAC GGAAACCCCG ACCGAAGAAA CAAAGAGTTA TAATCAGAAA ATAAATAAAA  
 TTTGAGAGTA TGACCGTGAA TAAAATTTAC GCACTGCAAC TTTTCTCGA CTTAATTATT  
**T**TATTATCTA TTTATGA**TT** TTAGTTAAGA TCTTATT**TG**C ATTT**TG**GAAT TTTTTTTTTT  
 TTTTATG**A**G - 3'



**Supplemental Figure 9.** DNA Oligonucleotides Used for Detection of Splicing Variants and Splicing Isoform Sequences as Revealed by Sequencing.

**Oligonucleotides**

**Oligonucleotides for genotyping of *Arabidopsis* mutants**

| Gene        | mutant        | comment                  | Primer name | Primer sequence                                 | Fragment sizes                         |
|-------------|---------------|--------------------------|-------------|-------------------------------------------------|----------------------------------------|
| <i>UPF1</i> | <i>lba1</i>   | CAPS PCR ( <i>Xba</i> I) | DNA1        | GAGGCTGTTTACTAAGAACTTTTG                        | 338 bp (WT),<br>299 bp ( <i>lba1</i> ) |
|             |               |                          | DNA2        | AAACTCTCGAACCTACAGGTTGCCA<br>GTGTTGATTCTTTTCTAG |                                        |
| <i>UPF3</i> | <i>upf3-1</i> | WT allele                | DNA3        | CCAGGTACATTATGCTCACAG                           | 353 bp                                 |
|             |               |                          | DNA4        | TTGAACTTTCTTTTTCCACATAC                         |                                        |
|             |               | Mutant allele            | DNA3        | CCAGGTACATTATGCTCACAG                           | 603 bp                                 |
|             |               |                          | DNA5        | TGGTTCACGTAGTGGGCCATCG                          |                                        |

**Oligonucleotides for co-amplification**

| Gene             | Alt. event | Primer name | Primer sequence          | Fragment sizes               |
|------------------|------------|-------------|--------------------------|------------------------------|
| <i>At5g53180</i> | 14429      | DNA6        | ATGGGAATGCACTGAAGAGG     | 381 bp (SI),<br>439 bp (SII) |
|                  |            | DNA7        | TGGTATCCGGCTGTCTTCTC     |                              |
| <i>At4g36960</i> | 7059       | DNA8        | CAGAGAAAGGGTCTTGCCAG     | 268 bp (SI),<br>440 bp (SII) |
|                  |            | DNA9        | CAAGTCTCCAAATTTTGACATG   |                              |
| <i>At1g11650</i> | 10271      | DNA10       | GTGCTATGACGGAGATGAATGG   | 174 bp (SI),<br>261 bp (SII) |
|                  |            | DNA11       | CATCTAATCCACCAACAAAACAGT |                              |
| <i>At5g17550</i> | 9364       | DNA12       | TGAGGAAGAGAGACTCGAGAATA  | 194 bp (SI),<br>321 bp (SII) |
|                  |            | DNA13       | GTAACCCCATTCGAAGACCT     |                              |
| <i>At1g58080</i> | 16583      | DNA14       | CTGTCACCTGTCTATTGCGATT   | 253 bp (SI),<br>280 bp (SII) |
|                  |            | DNA15       | ACCACTACTCACAAGATCCAAAAT |                              |
| <i>At2g30260</i> | 30373      | DNA16       | CACCGAATCAATCAATCTACATC  | 208 bp (SI),<br>243 bp (SII) |
|                  |            | DNA17       | TTGCATATTGTAAGCGCATTG    |                              |
| <i>At4g04350</i> | 34651      | DNA18       | AGGTTTGGCATATCAGGCT      | 237 bp (SI),<br>260 bp (SII) |
|                  |            | DNA19       | CTTCCTATCCAGTTTCTTTGCATT |                              |
| <i>At4g16990</i> | 12996      | DNA20       | AAGCGAAAATGGATGCGAG      | 162 bp (SI),<br>339 bp (SII) |
|                  |            | DNA21       | TTCAATCCCGACGAAGTCAC     |                              |
| <i>At3g58760</i> | 32604      | DNA22       | GGCTCCAGAGGTTTATAGGAAT   | 237 bp (SI),<br>270 bp (SII) |
|                  |            | DNA23       | CTTTTTGATGCTTCTTTGTCCC   |                              |
| <i>At1g79600</i> | 28255      | DNA24       | CTCGTCTCGGACCTACTTTT     | 284 bp (SI),<br>256 bp (SII) |
|                  |            | DNA25       | AGGGCGTTGAACTTTGACA      |                              |
| <i>At3g66654</i> | 12107      | DNA26       | CAATCTCCACGATTCTCTCTT    | 65 bp (SI),<br>317 bp (SII)  |
|                  |            | DNA27       | GAAAGCAAACGAGGGATACAAC   |                              |

|                  |       |       |                            |                              |
|------------------|-------|-------|----------------------------|------------------------------|
| <i>At5g65720</i> | 9015  | DNA28 | CAGAACCCTAACCAAACCACAC     | 355 bp (SI),<br>278 bp (SII) |
|                  |       | DNA29 | CATATTGTTGCGCTCCGTTG       |                              |
| <i>At1g28660</i> | 16281 | DNA30 | TGCCTCATCTTCTCGTGATTG      | 263 bp (SI),<br>168 bp (SII) |
|                  |       | DNA31 | CTTCTGTGCGGTTCTGATATT      |                              |
| <i>At4g17370</i> | 6670  | DNA32 | AAGGCAGAGACTTTGGTAATG      | 251 bp (SI),<br>331 bp (SII) |
|                  |       | DNA33 | ATCAATTATATCAGGCACCTTTCC   |                              |
| <i>At2g27720</i> | 11513 | DNA34 | CCATCAACACTTCCGCAAAA       | 177 bp (SI),<br>237 bp (SII) |
|                  |       | DNA35 | CAGCCAAGTCTTTCCCTTT        |                              |
| <i>At3g17609</i> | ---   | DNA36 | TGTCTCTCCAACGACCCAAT       | 321 bp (SI),<br>279 bp (SII) |
|                  |       | DNA37 | ATTCCAAATCACTCACATACACTTTC |                              |
| <i>At3g23280</i> | ---   | DNA38 | TGTGGAAAGCAAACCTTGAAG      | 296 bp (SI),<br>224 bp (SII) |
|                  |       | DNA39 | ATCTTCTGATGGTGGTGGTG       |                              |
| <i>At2g46700</i> | 12039 | DNA40 | GTCATACTTGTCTGGCCGT        | 227 bp (SI),<br>393 bp (SII) |
|                  |       | DNA41 | TCCACCATCACACAACTCCA       |                              |
| <i>At5g20840</i> | 14231 | DNA42 | AGTGTCAAAGAGTGATATGATTGC   | 184 bp (SI),<br>210 bp (SII) |
|                  |       | DNA43 | ACTCTCATGGTTCGCATATATTCT   |                              |
| <i>At3g55850</i> | 12806 | DNA44 | TTGCCACTCTCAAGGGTT         | 268 bp (SI),<br>195 bp (SII) |
|                  |       | DNA45 | CATGATGCAGAGGGCAATT        |                              |
| <i>At3g19980</i> | 12227 | DNA46 | AATATTACACTTTTGCGCGGAA     | 177 bp (SI),<br>293 bp (SII) |
|                  |       | DNA47 | ACCGTGAACACATAGAAGTGT      |                              |
| <i>At2g42500</i> | 11984 | DNA48 | GAAACCATGAAAGTCGTCAGATT    | 227 bp (SI),<br>360 bp (SII) |
|                  |       | DNA49 | ATGGGGCACTTCTTGAAGT        |                              |
| <i>At4g35230</i> | 13461 | DNA50 | CTAAGAAATGGAAGAGTGACACC    | 206 bp (SI),<br>367 bp (SII) |
|                  |       | DNA51 | CATTGAGAGGCGAGTTTCGAC      |                              |

**Oligonucleotides for RT-qPCR**

| Gene             | Transcript variant | Primer name | Primer sequence          | Fragment sizes |
|------------------|--------------------|-------------|--------------------------|----------------|
| <i>At5g53180</i> | SI                 | DNA52       | TTGATGTCTTGCATCTGGTATTC  | 161 bp         |
|                  |                    | DNA53       | ACCTAGGGATGCTTCTTCCAT    |                |
| Alt_event 14429  | SII                | DNA54       | TTCAGTGGCAGCCTAATGC      | 156 bp         |
|                  |                    | DNA55       | TCCATCGAGGGCAAGTTT       |                |
| total            |                    | DNA56       | GCAATCCACAGCAATACCAC     | 109 bp         |
|                  |                    | DNA57       | CCACCCATTCCCATAGAGC      |                |
| <i>At4g36960</i> | SI                 | DNA58       | AGAGATTTCAAAGGAGGAAGAGG  | 95 bp          |
|                  |                    | DNA59       | GAAACCCTAACCACTCAAAAAG   |                |
| Alt_event 7059   | SII                | DNA60       | GAAAGAGATGTGCTTGTGGTTTG  | 107 bp         |
|                  |                    | DNA59       | GAAACCCTAACCACTCAAAAAG   |                |
| total            |                    | DNA61       | ATGAAATCTGTGGACAAGAGGTAG | 113 bp         |
|                  |                    | DNA62       | ACCAAAATATTCAGGACGAGAAG  |                |

|                                        |       |                       |                                |        |
|----------------------------------------|-------|-----------------------|--------------------------------|--------|
| <i>At4g19100</i><br>Alt_event<br>35151 | SI    | DNA63                 | CGTAGATCTTCTTCCAAGCTTGA        | 118 bp |
|                                        |       | DNA64                 | CTAAGCGGTTAATGCAAGTAATG        |        |
|                                        | SII   | DNA65                 | CGTAGATCTTCTTCCAAGTTTGATT      | 101 bp |
|                                        |       | DNA66                 | ATGTAACAAGAGATCGGAAACG         |        |
|                                        | SIII  | DNA67                 | AGATCTTCTTCCAAGCACCAT          | 104 bp |
|                                        |       | DNA68                 | GTTTCCGGGTTTTGGCTTTT           |        |
| total                                  | DNA69 | CTTCTTTGGTACGGCTTTAGC | 103 bp                         |        |
|                                        | DNA70 | CTTCTTAGCTTCGTTCCAGC  |                                |        |
| <i>At2g27720</i><br>Alt_event<br>11513 | SI    | DNA71                 | GAAGGTTGTTGCTGCGTTTT           | 101 bp |
|                                        |       | DNA72                 | CTGTCTCAGCACCAACTGA            |        |
|                                        | SII   | DNA73                 | CATTTCCAGCAAACATATACAATTCC     | 111 bp |
|                                        |       | DNA72                 | CTGTCTCAGCACCAACTGA            |        |
|                                        | total | DNA74                 | GGTTGCTTCTGCTACATCTGGA         | 119 bp |
|                                        |       | DNA75                 | ACAAACTGAAACCCATGTCATC         |        |
| Intergenic<br>region 286               | total | DNA76                 | TCTTCGCATTACACCGGTG            | 102 bp |
|                                        |       | DNA77                 | GAGGAGACATGAAAGAGCACTT         |        |
| Intergenic<br>region 650               | total | DNA78                 | TTCACCTCTCGATAATCACATATTTTTG   | 98 bp  |
|                                        |       | DNA79                 | ACCAGAAAAAAGAAAGAGATTCCAAG     |        |
| Intergenic<br>region 881               | total | DNA80                 | ATGGAATCTTTGTCGATAGGGG         | 106 bp |
|                                        |       | DNA81                 | TGTTTCGATCGTGAGAGAGAGA         |        |
| Intergenic<br>region 869               | total | DNA82                 | AGGTACATAAAAACGAGGGGG          | 101 bp |
|                                        |       | DNA83                 | CCAAACGCGACGAACGTAA            |        |
| Intergenic<br>region 471               | total | DNA84                 | CAGGGATATGTGTGCAGCT            | 95 bp  |
|                                        |       | DNA85                 | AAGGTATTTACCAAACGAGCG          |        |
| <i>At2g33051</i>                       | total | DNA86                 | AGATTTTATGACGCGACGAC           | 92 bp  |
|                                        |       | DNA87                 | TGCTTATGAAATCACCTGGCA          |        |
| <i>At1g56612</i><br>Alt_event<br>2380  | SI    | DNA88                 | ATCCGTGGATAAGGAAGAAGAGA        | 98 bp  |
|                                        |       | DNA89                 | CCTTGCTGGATAGGAAGATTT          |        |
|                                        | SII   | DNA88                 | ATCCGTGGATAAGGAAGAAGAGA        | 112 bp |
|                                        |       | DNA90                 | AGTTGGTCTATCCTGTAATTCC         |        |
|                                        | total | DNA91                 | GGGAATCAGCAGCTCCT              | 108 bp |
|                                        |       | DNA92                 | GTTCTGTCTGTCTTTGTTCCG          |        |
| <i>At1g13320</i>                       | total | DNA93                 | GGTAATAACTGCATCTAAAGACAGAGTTCC | 102 bp |
|                                        |       | DNA94                 | CCACAACCGCTTGGTCCG             |        |

**Oligonucleotides for RLM-RACE**

| Intergenic region     | Transcript end | Primer description | Primer name | Primer sequence            |
|-----------------------|----------------|--------------------|-------------|----------------------------|
| Intergenic region 869 | 5 prime        | GSP                | DNA95       | CGTTCGTCGCGTTTGGCTTCTGT    |
|                       |                | GSP nested         | DNA96       | CCATTTATGGTCCACTTTGTCTTCCT |
|                       | 3 prime        | GSP                | DNA97       | CGTCTCCACCAATTCCATCTCCACTA |
|                       |                | GSP nested         | DNA98       | CCCGCAGAGGAAAAGGCCATAAA    |
| Intergenic region 881 | 5 prime        | GSP                | DNA99       | GGGATGACAGCGGATCTTGAAAA    |
|                       |                | GSP nested         | DNA100      | GGGATGACAGCGGATCTTGAAAA    |
|                       | 3 prime        | GSP                | DNA101      | TCCGCTGTCATCCCACCACTATAT   |
|                       |                | GSP nested         | DNA102      | CATCATCCAATCGACGGAAACCC    |

**Sequences**

Primer binding sites are marked in bold letters; alternative regions are underlined.

**At4g36960**

Primer: DNA8/DNA9

Alternative splicing event: 7059

SI

**CAGAGAAAGG** **GTCTTGCCAG** TTTAGGGCAT CCTTGTGGGT GAGAGAGCGA TTGAGAGATT  
TCAAAAAGGAG GAAGAGGAAG ATACGAGTGT GAGAGAGATT TAGAGGGAGA GAAGAAAGAG  
AGATTCTTTT TGAGTGTGTT AGGGTTTCAT TTCCTCTGCA GATCTACATT TATCTCTTCT  
CATGGAACGG AAGCTTGTGG TTTTGGGAAT CCCGTGGGAT ATTGATTCCG ATGGGCTTAA  
GGATTACATG **TCAAAATTTG** **GAGACTTG**

SII

**CAGAGAAAGG** **GTCTTGCCAG** TTTAGGGCAT CCTTGTGGGT GAGAGAGCGA TTGAGAGATT  
TCAAAAAGGTC AGTGTGTGAG TTTTCGAATT TTCACAATGA ATCTAAAAAA AGAAGATAAA  
TTTAGTTTCA TTTGTTTCTT AATCGGAGAG AAATTTGTAT GCCCCAAAAA CAAAAATGAT  
GAATTGGTGT TTGATGATGA TAATTGTGTG TGAGAAAGAG ATGTGCTTGT GGTTTGCAGG  
AGGAAGAGGA AGATACGAGT GTGAGAGAGA TTTAGAGGGA GAGAAGAAAG AGAGATTCCT  
TTTGAGTGTG TTAGGGTTTC ATTCCTCTG CAGATCTACA TTTATCTCTT CTCATGGAAC  
GGAAGCTTGT GGTTTTGGGA ATCCCCTGGG ATATTGATTC CGATGGGCTT AAGGATTACA  
**TGTCAAAATT** **TGGAGACTTG**

**At1g11650**

Primer: DNA10/DNA11

Alternative splicing event: 10271

SI

**GTGCTATGAC** **GGAGATGAAT** **GGCGTTCCTT** GTTCTACTAG ACCTATGAGA ATTGGTCCCG  
CTGCTAGCAA GAAAGGTGTA ACTGGTCAAA GAGATTCATA CCAGAGCTCT GCTGCAGGGG  
TAACAACCTGA TAATGATCCA AATAACACAA **CTGTTTTTGT** **TGGTGGATTA** **GATG**

SII

**GTGCTATGAC** **GGAGATGAAT** **GGCGTTCCTT** GTTCTACTAG ACCTATGAGA ATTGGTCCCG  
CTGCTAGCAA GAAAGGTGTA ACTGGTCAAA GAGGGGAGTC AAGAGGCTCT CTATCATCTT  
GAGGCCTGGA ACTGATATTC AGCTGAAATG GTTATCTCCT TATTGAGTGC CCATGCTTAG  
ATTCATACCA GAGCTCTGCT GCAGGGGTAA CAACTGATAA TGATCCAAAT AACACA**ACTG**  
**TTTTTGTGG** **TGGATTAGAT** **G**

**At5g17550**

Primer: DNA12/DNA13

Alternative splicing event: 9364

SI

**TGAGGAAGAG** **AGACTCGAGA** **ATATGGCCAA** CGATACTCAC ACCGATGACT TAGACGAGCT  
TCTCGATAGT GCCTTGGATG ATTTCAAGGA TCTTAATCTT ACTCAAAGAA ATGGAGGGGT  
TAAGAAAGAA GAGGGTGATA AAAAAGAGAC AGAGTCATTG CCAAGTGGGG TTCA**AGGTCT**  
**TGGAATGGGG** **TTAC**

SII

**TGAGGAAGAG** **AGACTCGAGA** **ATATGGCCAA** CGATACTCAC ACCGATGACT TAGACGAGCT  
TCTCGATAGT AATAATTTCC TAACGAATTT TAATTTGATT TGATAACATG TTCACCAATT  
CTAGGTGATT GGTGAAAAAC GTTTTTGTTT TTGTGGGTTT GTTTTCTATA ATTTAGAATT  
CTGGGTCTTT CTCAGGTGCC TTGGATGATT TCAAGGATCT TAATCTTACT CAAAGAAATG  
GAGGGGTTAA GAAAGAAGAG GGTGATAAAA AAGAGACAGA GTCATTGCCA AGTGGGGTTC  
**AAGGTCTTGG** **AATGGGGTTA** **C**

**At1g58080**

Primer: DNA14/DNA15

Alternative splicing event: 16583

SI

**CTGTCACCTG** **TCTATTGCGA** **TTCCAAACTA** TGGGATATTT GAGAATATAA ATTCTCTGAA  
GGAGCTAGCG CAAATGCCCC AATGGAGTGG AGAGAGACCC TTACGCTTAG CTACTGGCTT  
CACTTATCTC GGCCCCAAAT TTATGAAAGA AAATGGCATA AAGCATGTGG TGTTTTCAAC  
TGCAGACGGA GCACTGGAGG CAGCTCCAGC GATGGGGATA GCTGATGCCA **TTTTGGATCT**  
**TGTGAGTAGT** **GGT**

SII

**CTGTCACCTG** **TCTATTGCGA** **TTCCAAACTA** TGGGATATTT GAGAATATAA ATTCTCTGAA  
GGAGCTAGCG CAAATGCCCC AATGGAGTGA AGAGAGACCC TTACGCTTAG CTACTGGCTT  
CACTTATGTA TGATGAGTTA CAGATTCTTC TTTGCTCGGC CCCAAATTTA TGAAAGAAAA  
TGGCATAAAG CATGTGGTGT TTCAACTGC AGACGGAGCA CTGGAGGCAG CTCCAGCGAT  
GGGGATAGCT GATGCC**ATTT** **TGGATCTTGT** **GAGTAGTGGT**

**At2g30260**

Primer: DNA16/DNA17

Alternative splicing event: 30373

SI

**CACCGAATCA** **ATCAATCTAC** **ATCCAAAACC** TCAACGAAAG GATCAAGAAA GAGGAATTGA  
AGAGATCTCT TTACTGTTTT TTCTCTCAGT TTGGGAGGAT ACTTGATGTG GTTGCTTTGA  
AGACTCCGAA GCTCCGAGGA CAAGCTTGGG TTACTTTTAG TGAAGTCACT GCTGCTGGTC  
ATGCTGTTTCG TCAGATGCAA AATTTTCCCT TCTATGATAA **ACCAATGCGC** **TTACAATATG**  
**CAA**

SII

**CACCGAATCA** **ATCAATCTAC** **ATCCAAAACC** TCAACGAAAG GATCAAGAAA GAGGTTTGGG  
AGGATACTTG ATGTGGTTGC TTTGAAGACT CCGAAGCTCC GAGGACAAGC TTGGGTACT  
TTTAGTGAAG TCACTGCTGC TGGTCATGCT GTTCGTCAGA TGCAAAATTT TCCCTCTAT  
GATAAAC**CAA** **TGCGCTTACA** **ATATGCAA**

**At4g04350**

Primer: DNA18/DNA19

Alternative splicing event: 34651

SI

**AGGTTTGGCA TATCAGGCTG** AAGTACCGGT CAATTGGTGC CCGGCTCTTG GTACTGTTTT  
 GGCCAATGAA GAAGTGGTGG ATGGTGTTAG TGAGCGTGGT GGCCACCCGG TTATAAGAAA  
 GCCGATGAGG CAATGGATGC TGAAGATTAC TGCCTACGCT GATCGTCTTC TAGAAGATTT  
 GGACGAGCTT GAGTGGCCTG AAAGTATAAA **GGAAATGCAA AGAAACTGGA TAGGAAG**

SII

**AGGTTTGGCA TATCAGGCTG** AAGTACCGGT CAATTGGTGC CCGGCTCTTG GTACTGTTTT  
 GGCCAATGAA GAAGTGGTGG ATGGTGTTAG TGAGCGTGGT GGCCACCCGG TTATAAGAAA  
GTGACATTGT TTATTACCAA GCAGCCGATG AGGCAATGGA TGCTGAAGAT TACTGCGTAC  
 GCTGATCGTC TTCTAGAAGA TTTGGACGAG CTTGAGTGGC CTGAAAGTAT **AAAGGAAATG**  
**CAAAGAACT GGATAGGAAG**

**At4g16990**

Primer: DNA20/DNA21

Alternative splicing event: 12996

SI

**AAGCGAAAAT GGATGCGAGC** TCTAGCAGAG GTAGCACATC TAGCCGGAGA AGATCTTCGG  
 AACTGGCGTA GCGAAGCAGA AATGCTTGAA AATATCGCCA AGGATGTTTC AAACAAACTC  
 TTCCCCCAT CAAATAATTT **CAGTGACTIONC GTCGGGATTG AA**

SII

**AAGCGAAAAT GGATGCGAGC** TCTAGCAGAG GTAGCACATC TAGCCGGAGA AGATCTTCGG  
AACTGATAAG TTTCAGGTGG GTAAACTTCC GATAAGTGAT TGTCGGAACA GTGTGTATGA  
GGATTAAACA CAGAGAAAGA TCGTGTGGTG ATTGTAGTGT CGGTAAACAA GTTTTTAAAG  
CCTCCCAGCT GTAATGTATC AACCGTCGGA AAGGGGTGGG TCCCACGAGC CTGAGTAAAG  
ACGCGTAGCG AAGCAGAAAT GCTTGAAAAT ATCGCCAAGG ATGTTTCAA CAAACTCTTC  
 CCCCCATCAA ATAATTTTCAG **TGACTTTCGTC GGGATTGAA**

SIII

**AAGCGAAAAT GGATGCGAGC** TCTAGCAGAG GTAGCACATC TAGCCGGAGA AGATCTTCGG  
AACTGGTGGG TAAACTTCCG ATAAGTGATT GTCGGAACAG TGTGTATGAG GATTAAACAC  
AGAGAAAGAT CGTGTGGTGA TTGTAGTGTC GGTAACAAG TTTTTAAAGC CTCCCAGCTG  
TAATGTATCA ACCGTCGGAA AGGGGTGGGT CCCACGAGCC TGAGTAAAGA CGCGTAGCGA  
 AGCAGAAATG CTTGAAAATA TCGCCAAGGA TGTTTCAAAC AAACCTCTTC CCCCATCAA  
 TAATTTTCAGT **GACTTCGTCG GGATTGAA**

**At3g58760**

Primer: DNA22/DNA23

Alternative splicing event: 32604

SI

**GGCTCCAGAG GTTTATAGGA** ATGAAGAGTA TGATACAAAA GTAGATGTAT TCTCTTTCGC  
 TTTAATCTTA CAAGAGATGA TAGAAGGTTG TGAACCATT CATGAGATAG AAGACCGCGA  
 AGTTCCTAAA GCATATATTG AAGATGAACG TCCACCATT AATGCTCCAA CAAAATCATA  
 TCCTTTCGGG TTACAAGAGC TAATCCAGGA TTGTTGGGAC **AAAGAAGCAT CAAAAAG**

## SII

**GGCTCCAGAG** **GTTTATAGGA** **ATGAAGAGTA** TGATACAAAA GTAGATGTAT TCTCTTTTCGC  
 TTTAATCTTA CAAGAGAATG TTGTTTTGTG GGTTAACAAA ACCTAACAGA TGATAGAAGG  
 TTGTGAACCA TTTCATGAGA TAGAAGACCG CGAAGTTCCT AAAGCATATA TTGAAGATGA  
 ACGTCCACCA TTCAATGCTC CAACAAGATC ATATCCTTTC GGGTTACAAG AGCTAATCCA  
 GGATTGTTGG **GACAAAGAAG** **CATCAAAAAG**

**At1g79600**

Primer: DNA 24/DNA25

Alternative splicing event: 28255

## SI

**CTCGTCTCGG** **ACCTACTTTT** GTTAAATTGG GTCAAGGTTT GTCCACCCGA CCCGACCTCT  
 GTCCACCCGA TTACCTTGAA GAACCTGCAG AGCTTCAGGA TGCTTTGCCA ACCTTCCCTG  
ATGCAGAGGC ATTTGCTTGC ATTGAGAGAG AGTTGGATTT GTCGCTAGAG ACCATTTTCT  
 CGTCTGTATC TCCTGAGCCA ATCGCAGCAG CTAGTCTTGG CCAGGTTTAC AAAGCTCAGC  
 TGAGGTATTC AGGTCAGGTT GTTGCTGTCA **AAGTTCAACG** **CCCT**

## SIII

**CTCGTCTCGG** **ACCTACTTTT** GTTAAATTGG GTCAAGGTTT GTCCACCCGA CCCGACCTCT  
 GTCCACCCGA TTACCTTGAA GAACCTGCAG AGCTTCAGAG GCATTTGCTT GCATTGAGAG  
 AGAGTTGGAT TTGTCGCTAG AGACCATTTT CTCGTCTGTA TCTCCTGAGC CAATCGCAGC  
 AGCTAGTCTT GGCCAGGTTT ACAAAGCTCA GCTGAGGTAT TCAGGTCAGG TTGTTG**CTGT**  
**CAAAGTTCAA** **CGCCCT**

## SIV

**CTCGTCTCGG** **ACCTACTTTT** GTTAAATTGG GTCAAGGTTT GTCCACCCGA CCCGACCTCT  
 GTCCACCCGA TTACCTTGAA GAACCTGCAG AGCTTCAGTG TCTAAGTAGG ATGCTTTGCC  
AACCTCCCT GATGCAGAGG CATTTGCTTG CATTGAGAGA GAGTTGGATT TGTCGCTAGA  
GACCATTTTC TCGTCTGTAT CTCCTGAGCC AATCGCAGCA GCTAGTCTTG GCCAGGTTTA  
 CAAAGCTCAG CTGAGGTATT CAGGTCAGGT TGTTG**CTGT** **AAAGTTCAAC** **GCCCT**

**At3g66654**

Primer: DNA26/DNA27

Alternative splicing event: 12107

## SI

**CAATCTCCAC** **GATTCCTCTC** **TTCTCTCTAA** CTTCCAGAGA CAAGTTGTAT **CCCTCGTTTG**  
**CTTTC**

## SII

**CAATCTCCAC** **GATTCCTCTC** **TTCTCTCTAA** CTTCCAGGTC TTTGGATTTT TATAGAAAGA  
AAGATCTGTT TATTATTTGA TTGGAACATG ATAAGCTGCT CCGTTTCTCA TATCCACTTT  
TGTTCAATTT ATTTCAATTT GATCGATAAT TGGAAAAGTA CTGGATCTGG TGTATCGGAA  
 GTTACCGGTC AAGCTATGTA TGAACCCTTG TGATATTTTC ACATGCGTTT ATTCATTCAA  
 ATATGCTAGA TTTTAAATCT GGTCAATACG TGATATCAGG GTTTCTTCAG TTGGAGACAA  
**GTTGTATCCC** **TCGTTTGCTT** **TC**

## SIII

**CAATCTCCAC** **GATTCCTCTC** **TTCTCTCTAA** CTTCCAGTAC TGGATCTGGT GTATCGGAAG  
TTACCGGTCA AGCTATGTAT GAACCCTTGT GATATTTTCA CATGCGTTTA TTCATTCAA  
TATGCTAGAT TTTTAATCTG GTCAATACGT GATATCAGGG TTTCTTCAGT TGGAGACAAG  
**TTGTATCCCT** **CGTTTGCTTT** **C**



SIV

**CAATCTCCAC GATTCTCTC TTCTCTCTAA CTTCCAGGTA CGTTTTTCGA GAACCCAATG**  
**AAGCAATCAA AGTCCTTGGA ATTCATTTGA TTTTACTTTC AGGTCTTTGG ATTTCTATAG**  
**AAAGAAAGAT CTGTTTATTA TTTGATTGGA ACATGATAAG CTGCTCCGTT TCTCATATCC**  
**ACTTTTGTTT AATTTATTTT AATTTGATCG ATAATTGGAA AAGTACTGGA TCTGGTGTAT**  
**CGGAAGTTAC CGGTCAAGCT ATGTATGAAC CCTTGTGATA TTTTCACATG CGTTTATTCA**  
**TTCAAATATG CTAGATTTTT AATCTGGTCA ATACGTGATA TCAGGGTTTC TTCAGTTGGA**  
**GACAAGTTGT ATCCCTCGTT TGCTTTC**

**At5g65720**

Primer: DNA28/DNA29

Alternative splicing event: 9015

SI

**CAGAACCCTA ACCAAACCAC** ACGGCACTTT TTCCCAGGTGT CGCTACTTAT CAACCGCCGC  
 TGCTGCGACG GAGGTGAATT ACGAGGATGA ATCGATTATG ATGAAAGGAG TTCGAATTTT  
 AGGTAGACCT CTTTACTTAG ATATGCAAGC GACGACTCCG ATTGATCCTA GAGTATTCTGA  
 TGCGATGAAT GCTTCACAGA TCCATGAGTA TGGGAATCCT CACTCGCGAA CGCATCTCTA  
 CGGCTGGGAA GCTGAGAACG CCGTTCGAGAA CGCACGAAAC CAGGTTCGCGA AACTGATCGA  
 AGCTTCACCG AAGGAGATCG TATTCGTGTC CCGTGCAACG **GAGGCGAACA ATATG**

SII

**CAGAACCCTA ACCAAACCAC** ACGGCACTTT TTCCCAGGTGT CGCTACTTAT CAACCGCCGC  
 TGCTGCGACG GAGGTGAATT ACGAGGATGA ATCGATTATG ATGAAAGGAG TTCGAATTTT  
 AGATCCATGA GTATGGGAAT CCTCACTCAC GAACGCATCT CTACGGTTGG GAAGCTGAGA  
 ACGCCGTCGA GAACGCACGA AACCAGGTCG CGAAACTGAT CGAAGCTTCA CCGAAGGAGA  
 TCGTATTCGT GTCCGGTGCA **ACGGAGCCGA ACAATATG**

**At1g28660**

Primer: DNA30/DNA31

Alternative splicing event: 16281

SI

**TGCCTCATCT TCTCGTGATT GCAGAGAGAT GCTTGGAGAC TCGCTGATAC TCATGGGAGA**  
**GATTGGAGGT AACGACTTTT TTTACCCATC CTCCGAAGGC AAAAGTATCA ATGAAACCAA**  
**ACTACAGGAT TTGATCATCA AAGCTATTTT TTCTGCAATT GTGGATTTGA TCGCTTTAGG**  
**GGGCAAACA TTTTGGTAC CCGGAGGCTT CCCAGCAGGA TGTTCCGCAG CGTGTCTTAC**  
**TCAATATCAG AACGCGACAG AAG**

SII

**TGCCTCATCT TCTCGTGATT GCAGAGAGAT GCTTGGAGAC TCGCTGATAC TCATGGGAGA**  
**GATTGGAGGA TTTGATCGCT TTAGGGGGCA AAACATTTTT GGTACCCGGA GGCTTCCCAG**  
**CAGGATGTTT CGCAGCGTGT CTTACTCAAT ATCAGAACGC GACAGAAG**

**At4g17370**

Primer: DNA32/DNA33

Alternative splicing event: 6670

SI

**AAGGCAGAGA CTTTGTAAT** GTCAAGATGG TAGCAATCCG AGAACATAGA TTCCCTTTCT  
 TGGTTAAGGT GAACAACCTGG AATAGATTCA ATGTGAACAC TGGAGGGACC TTAGTGGAGA  
 AATGCTGCCA CTTCTTTGAT CTAATGAGGC TCTTTGCCGG TGCAAATCCT GTCTGTGTGA  
 TGGCTTCTGG AGGCATGGAT GTGAACCACA AGGATGAAGT TTATGGTGGG **AAGGTGCCTG**  
**ATATAATTGA T**

SII

**AAGGCAGAGA CTTTGGTAAT GTCAAGATGG TAGCAATCCG AGAACATAGA TTCCCTTTCT**  
 TGGTTAAGGT AGGCTTAAAC AAGATGGGAC TATGTGTAGT GTTTACGCTT CACATTTTTA  
TATGATTGCT GAGAGAACAC ATCACTAGGT GAACAACTGG AATAGATTCA ATGTGAACAC  
 TGGAGGGACC TTAGTGGAGA AATGCTGCCA CTTCTTTGAT CTAATGAGGC TCTTTGCCGG  
 TGCAAATCCT GTCTGTGTGA TGGCTTCTGG AGGCATGGAT GTGAACCACA AGGATGAAGT  
**TTATGGTGG AAGGTGCCTG ATATAATTGA T**

**At2g46700**

Primer: DNA40/DNA41

Alternative splicing event: 12039

SI

**GTCATACTTG TTCTGGCCGT** GGTAAGAAGG GAGATATTAA GGATCATCCT ATTGCTGTCA  
 AGATCATCTC CAAGGCTAAG ATGACAACAG CAATTGCAAT TGAAGATGTT CGCAGGGAGG  
 TGAAGTTACT GAAATCATT A TCTGGACACA AATATTTAAT CAAATATTAT GATGCATGTG  
 AGGACGCCAA TAACGTATAC ATAGTCATGG **AGTTGTGTGA TGGTGG A**

**At5g20840**

Primer: DNA42/DNA43

Alternative splicing event: 14231

SI

**AGTGTCAAAG AGTGATATGA TTGCATTGCA ACATTCTAGC GTGCTTTGCA AACTGCAAA**  
 TTTAAGAGAC GAGAACAGGT ACAAGAGACT CCTGTGTATG GTGGACCTTA CGAAAGACTT  
 CTTTTTCAGC TATTCTTACA ATATAATGCG AAGTTTCCAG **AAGAATATAT GCGACCATGA**  
**GAGT**

SII

**AGTGTCAAAG AGTGATATGA TTGCATTGCA ACATTCTAGC GTGCTTTGCA AACTGCAAA**  
 TTTAAGAGAC GAGAACAGCG AGAGTGCACG GCTTTAGCAA CATTGTACAA GAGACTCCTG  
 TGTATGGTGG ACCTTACGAA AGACTTCTTT TTCAGCTATT CTTACAATAT AATGCGAAGT  
**TTCCAGAAGA ATATATGCGA CCATGAGAGT**

SIII

**AGTGTCAAAG AGTGATATGA TTGCATTGCA ACATTCTAGC GTGCTTTGCA AACTGCAAA**  
 TTTAAGAGAC GAGAACAGGT ATTTTGATAT ATCTTTGGCT ACATTATGCT TTTTAAATTT  
ATATATATTT ATTGCAATCC CATTGCTGAA GAAATGTTCT GTTTTTCGTT TCTGTTTGGT  
CGTTTCTGTT TGGTGAAAAG CGAGAGTGCA CGGCTTTAGC AACATTGTAC CATTCCATCC  
ATTATATGTA CTGAAGTCAT TAAACTCTTG CGTTTCTCTA TCTGATGTTT CCCACTTGTT  
GATAAATAGG TACAAGAGAC TCCTGTGTAT GGTGGACCTT ACGAAAGACT TCTTTTTTCAG  
 CTATTCTTAC AATATAATGC GAAGTTTCCA **GAAGAATATA TGCGACCATG AGAGT**

SIV

**AGTGTCAAAG AGTGATATGA TTGCATTGCA ACATTCTAGC GTGCTTTGCA AACTGCAAA**  
 TTTAAGAGAC GAGAACAGGT ATTTTGATAT ATCTTTGGCT ACATTATGCT TTTTAAATTT  
ATATATATTT ATTGCAATCC CATTGCTGAA GAAATGTTCT GTTTTTCGTT TCTGTTTGGT  
CGTTTCTGTT TGGTGAAAAG CGAGAGTGCA CGGCTTTAGC AACATCGTAC AAGAGACTCC  
 TGTGTATGGT GGACCTTACG AAAGACTTCT TTTTCAGCTA TTCTTACAAT ATAATGCGAA  
**GTTTCCAGAA GAATATATGC GACCATGAGA GT**

SV

**AGTGTCAAAG AGTGATATGA TTGCATTGCA** ACATTCTAGC GTGCTTTGCA AACTGCAAA  
 TTTAAGGGAC GAGAACAGCG AGAGTGCACG GCTTTAGCAA CATTGTACCA TTCCATCCAT  
 TATATGTACT GAAGTCATTA AACTCTTGCG TTTCTCTATC TGATGTTTCC CACTTGTTGA  
 TAAATAGGTA CAAGAGACTC CTGTGTATGG TGGACCTTAC GAAAGACTTC TTTTTCAGCT  
 ATTCTTACAA TATAATGCGA AGTTTCCAGA **AGAATATATG CGACCATGAG AGT**

**At3g55850**

Primer: DNA44/DNA45

Alternative splicing event: 12806

SI

**TTGCCACTCT CAAGGGTTTT** ATAGGAGATG GAACTATGGA GGTGAATCTG GAGGGGAAGA  
 TTGTAGTGCC TGGACTTATT GATTCACATG TTCATCTGAT TTCTGGGGGA TTACAGATGG  
 CCCAAGTTGG ACTTCGTGGA GTGAGTCAAA AAGATGAGTT TTGTAAAATG GTGAAGGACG  
 CTGTGCAGAA TGCAAAAGAA GGCTCATGGA TTTTGGGTGG TGGCTGGAAC AATGATTTCT  
 GGGGAGGAGA **ATTGCCCTCT GCATCATG**

SII

**TTGCCACTCT CAAGGGTTTT** ATAGGAGATG GAACTATGGA GGTGAATCTG GAGGGGAAGA  
 TTGTAGTGCC TGGACTTATT GATTCACATG TTCATCTGAT TTCTGGGGGA TTACAGATGC  
 AAAAGAAGGC TCATGGATTT TGGGTGGTGG CTGGAACAAT GATTTCTGGG GAGGAGA**AATT**  
**GCCCTCTGCA TCATG**

SIII

**TTGCCACTCT CAAGGGTTTT** ATAGGAGATG GAACTATGGA GGTGAATCTG GAGGGGAAGA  
 TTGTAGTGCC TGGACTTATT GATTCACATG TTCATCTGAT TTCTGGGGGA TTACAGGTGA  
 TAATGGCATA GTGCAAACCTT ATTTCTGTGT TCTTTCTTCT TGCAATGATA TGTAATTATG  
 TATATTGTTA AGTTAACCTG AGATTAGATG ATTACATGCC ATTGTTTGAT CAGGTTTAGA  
 TATGAAGAAG TATACTATAC TCTCGTTTAC CTTATATCTT TTCCTTTTGC TTTTAATGTC  
 TTATCGCTTG AGCATAGATG GCCCAAGTTG GACTTCGTGG AGTGAGTCAA AAAGATGAGT  
 TTTGTAAAAT GGTGAAGGAC GCTGTGCAGA ATGCAAAAGA AGGCTCATGG ATTTTGGGTG  
 GTGGCTGGAA CAATGATTTT TGGGGAGGAG **AATTGCCCTC TGCATCATG**

**At3g19980**

Primer: DNA46/DNA47

Alternative splicing event: 12227

SI

**AATATTACAC TTTTGC GCGG AAATCATGAA** AGTAGGCAGC TAACGCAGGT GTATGGTTTTC  
 TATGACGAAT GCCAGAGGAA GTATGGTAAC GCTAATGCGT GGCGATATTG CACAGATGTT  
 TTTGACTATC TTACCCTGTC AGCTATTATA GATGGC**CACAG TTCTATGTGT TCACGGT**

SII

**AATATTACAC TTTTGC GCGG AAATCATGAA** AGTAGGCAGC TAACGCAGGG TTTTGAAAGT  
 TCTGATTTTG TACTACATGT GGCAATGTCA TGTCAGATGT AGACATCGAT GTTAGCTAAG  
 ATGCATTTTA TGTGAATCAA GTATTGGAAA GCTAATTTCA GAAGGTGTAT GGTTCCTATG  
 ACGAATGCCA GAGGAAGTAT GGTAACGCTA ATGCGTGGCG ATATTGCACA GATGTTTTTG  
 ACTATCTTAC CCTGTCAGCT ATTATAGATG GCACAGTTCT **ATGTGTTTAC GGT**

**At2g42500**

Primer: DNA48/DNA49

Alternative splicing event: 11984

SII

**GAAACCATGA AAGTCGTCAG ATTACTCAGG** TTTATGGATT TTATGATGAA TGTCTACGAA  
AGTACGGCAA CGCAAATGTT TGGAAAATCT TTACAGACCT CTTCGACTAT TTTCCCTCTGA  
CAGCCTTGTA TTATTTGGAA CCAAAGTAGT ACTTTTGTAC TGTGCTGTCG TATTTCTTTT  
GCTAGTGTCA CATCAACTGC AAGACGTTAG TATTCTGAAA AATGCAAAGA ATGGAGATCT  
GTTATATATG GAAGATTTCA TGTTGAGTCA GAAATATTTT GCCTTCATGG TGGATTATCT  
CCATCTATCG AGACCCTTGA CAACATAAGG AATTTTGATC **GAGTTCAAGA AGTGCCCCAT**

**At4g35230**

Primer: DNA50/DNA51

Alternative splicing event: 13461

SI

**CTAAGAAATG GAAGAGTGAC ACCTGAAAGT** GTTACGTATA GCTTTGGAAC TGTCCCTTCTG  
GATTTGCTTA GCGGAAAACA CATCCCTCCA AGCCATGCTC TCGATATGAT ACGAGGCAAG  
AATATTATTC TGTTGATGGA TTCACACCTC GAAGGAAAGT TCTCAACAGA AGAGGCTACT  
GTAGTGGTGC **AACTCGCCTC TCAATG**

SII

**CTAAGAAATG GAAGAGTGAC ACCTGAAAGT** GTTACGTATA GCTTTGGAAC TGTCCCTTCTG  
GATTTGCTTA GCGGAAAACA CATCCCTCCA AGCCATTTAT GTGAAGCTCT CGTAGTAGGT  
CATTGACCAT GGTTCCTAGA AACTGTATAA TACTGCTCTG TCATCATCTC TCTTGAAATT  
AGCTAAGATA TGTGCCACGC TCTTGTTCTT TAACCACTGT CTATCAGATT TAGCTCTCAA  
TATGTATTAT GGGCAAGGCT CTCGATATGA TACGAGGCAA GAATATTATT CTGTTGATGG  
ATTCACACCT CGAAGGAAAG TTCTCAACAG AAGAGGCTAC TGTAGTGGTC **AACTCGCCT**  
**CTCAATG**

**Supplemental Table 1.** Numbers of Alternative Splicing Events and Corresponding Gene Fractions as Depicted in Figure 3.

|                                                                                                       | <i>lba1upf3-1</i> |             | CHX          |             | <i>lba1upf3-1</i> + CHX |             | <i>lba1upf3-1</i> + SM-CHX |             | all NMD events |             | all AS events |             | <i>lba1upf3-1</i> or CHX |             |
|-------------------------------------------------------------------------------------------------------|-------------------|-------------|--------------|-------------|-------------------------|-------------|----------------------------|-------------|----------------|-------------|---------------|-------------|--------------------------|-------------|
|                                                                                                       | events            | %           | events       | %           | events                  | %           | events                     | %           | events         | %           | events        | %           | events                   | %           |
|                                                                                                       | 3,361             | 100         | 3,238        | 100         | 641                     | 100         | 1,231                      | 100         | 1,872          | 100         | 41,491        | 100         | 5,878                    | 100         |
| # events with significant changes in opposite directions (excluded in Venn diagrams in Fig. 3 and S3) | 99                |             | 159          |             | 6                       |             | 37                         |             |                |             |               |             |                          |             |
| <b>exon_skip</b>                                                                                      | <b>533</b>        | <b>15.9</b> | <b>758</b>   | <b>23.4</b> | <b>221</b>              | <b>34.5</b> | <b>154</b>                 | <b>12.5</b> | <b>375</b>     | <b>20.0</b> | <b>4,400</b>  | <b>10.6</b> | <b>1,056</b>             | <b>18.0</b> |
| up                                                                                                    | 366               | 68.7        | 726          | 95.8        | 211                     | 95.5        | 75                         | 48.7        | 286            | 76.3        |               |             |                          |             |
| down                                                                                                  | 167               | 31.3        | 32           | 4.2         | 10                      | 4.5         | 79                         | 51.3        | 89             | 23.7        |               |             |                          |             |
| <b>intron_ret</b>                                                                                     | <b>767</b>        | <b>22.8</b> | <b>1,574</b> | <b>48.6</b> | <b>184</b>              | <b>28.7</b> | <b>196</b>                 | <b>15.9</b> | <b>380</b>     | <b>20.3</b> | <b>10,139</b> | <b>24.4</b> | <b>2,124</b>             | <b>36.1</b> |
| up                                                                                                    | 267               | 34.8        | 175          | 11.1        | 18                      | 9.8         | 85                         | 43.4        | 103            | 27.1        |               |             |                          |             |
| down                                                                                                  | 500               | 65.2        | 1,399        | 88.9        | 166                     | 90.2        | 111                        | 56.6        | 277            | 72.9        |               |             |                          |             |
| <b>alt 5' ss</b>                                                                                      | <b>685</b>        | <b>20.4</b> | <b>356</b>   | <b>11.0</b> | <b>84</b>               | <b>13.1</b> | <b>279</b>                 | <b>22.7</b> | <b>363</b>     | <b>19.4</b> | <b>8,946</b>  | <b>21.6</b> | <b>940</b>               | <b>16.0</b> |
| up                                                                                                    | 432               | 63.1        | 218          | 61.2        | 63                      | 75.0        | 176                        | 63.1        | 239            | 65.8        |               |             |                          |             |
| down                                                                                                  | 253               | 36.9        | 138          | 38.8        | 21                      | 25.0        | 103                        | 36.9        | 124            | 34.2        |               |             |                          |             |
| <b>alt 3' ss</b>                                                                                      | <b>1,376</b>      | <b>40.9</b> | <b>550</b>   | <b>17.0</b> | <b>152</b>              | <b>23.7</b> | <b>602</b>                 | <b>48.9</b> | <b>754</b>     | <b>40.3</b> | <b>18,006</b> | <b>43.4</b> | <b>1,758</b>             | <b>29.9</b> |
| up                                                                                                    | 674               | 49.0        | 254          | 46.2        | 81                      | 53.3        | 201                        | 46.7        | 362            | 48.0        |               |             |                          |             |
| down                                                                                                  | 702               | 51.0        | 296          | 53.8        | 71                      | 46.7        | 321                        | 53.3        | 392            | 52.0        |               |             |                          |             |
| <b>genes</b>                                                                                          | <b>1,905</b>      |             | <b>1,660</b> |             | <b>390</b>              |             | <b>802</b>                 |             | <b>1,126</b>   |             | <b>11,711</b> |             | <b>3,004</b>             |             |
| <b>protein coding multi-exon genes</b>                                                                | <b>1,851</b>      |             | <b>1,598</b> |             | <b>371</b>              |             | <b>780</b>                 |             | <b>1,091</b>   |             | <b>11,393</b> |             | <b>2,915</b>             |             |
| <b>fraction protein coding multi-exon genes</b>                                                       | <b>8.5</b>        |             | <b>7.3</b>   |             | <b>1.7</b>              |             | <b>3.6</b>                 |             | <b>5.0</b>     |             | <b>52.2</b>   |             | <b>13.3</b>              |             |

**Supplemental Table 2.** Types of AS Events Detected in Different Samples.

Total numbers and fractions of AS events detected in various samples **(A)**, mutually exclusively detected in indicated comparisons **(B)**, and uniquely found in indicated control and NMD-impaired samples **(C)**.

(A)

| Event type       | WT    |        | <i>lba1</i> |        | <i>upf3-1</i> |        | <i>lba1upf3-1</i> |        | Mock  |        | CHX   |        |
|------------------|-------|--------|-------------|--------|---------------|--------|-------------------|--------|-------|--------|-------|--------|
| intron_retention | 6022  | 29,5%  | 7097        | 26,8%  | 6949          | 27,1%  | 7715              | 24,5%  | 6917  | 27,9%  | 6918  | 26,1%  |
| exon_skip        | 1433  | 7,0%   | 2077        | 7,8%   | 2081          | 8,1%   | 2800              | 8,9%   | 2236  | 9,0%   | 2638  | 9,9%   |
| alt_3prime       | 8945  | 43,9%  | 11883       | 44,8%  | 11446         | 44,7%  | 14328             | 45,6%  | 10476 | 42,2%  | 11222 | 42,3%  |
| alt_5prime       | 3980  | 19,5%  | 5441        | 20,5%  | 5158          | 20,1%  | 6597              | 21,0%  | 5168  | 20,8%  | 5739  | 21,6%  |
| Total            | 20380 | 100,0% | 26498       | 100,0% | 25634         | 100,0% | 31440             | 100,0% | 24797 | 100,0% | 26517 | 100,0% |

(B) Mutually exclusive

| Event type       | <i>lba1_not_WT</i> |        | <i>upf3-1_not_WT</i> |        | single_mutants not_WT |        | <i>lba1upf3-1_not_WT</i> |        | Mock_not_CHX |        |
|------------------|--------------------|--------|----------------------|--------|-----------------------|--------|--------------------------|--------|--------------|--------|
| intron_retention | 1650               | 19,4%  | 1545                 | 19,6%  | 2198                  | 19,6%  | 2470                     | 18,2%  | 1981         | 23,4%  |
| exon_skip        | 883                | 10,4%  | 844                  | 10,7%  | 1209                  | 10,8%  | 1566                     | 11,6%  | 1126         | 13,3%  |
| alt_3prime       | 4022               | 47,4%  | 3744                 | 47,5%  | 5264                  | 46,8%  | 6376                     | 47,0%  | 3476         | 41,1%  |
| alt_5prime       | 1936               | 22,8%  | 1741                 | 22,1%  | 2567                  | 22,8%  | 3144                     | 23,2%  | 1872         | 22,1%  |
| Total            | 8491               | 100,0% | 7874                 | 100,0% | 11238                 | 100,0% | 13556                    | 100,0% | 8455         | 100,0% |

(C) Unique to experiment

| Event type       | WT  |        | <i>lba1</i> |        | <i>upf3-1</i> |        | <i>lba1upf3-1</i> |        | Mock |        | CHX  |        |
|------------------|-----|--------|-------------|--------|---------------|--------|-------------------|--------|------|--------|------|--------|
| intron_retention | 41  | 23,6%  | 76          | 16,7%  | 69            | 16,8%  | 262               | 11,3%  | 104  | 16,7%  | 633  | 23,8%  |
| exon_skip        | 13  | 7,5%   | 50          | 11,0%  | 52            | 12,7%  | 291               | 12,5%  | 110  | 17,7%  | 593  | 22,3%  |
| alt_3prime       | 69  | 39,7%  | 214         | 47,0%  | 194           | 47,3%  | 1149              | 49,4%  | 238  | 38,3%  | 814  | 30,6%  |
| alt_5prime       | 51  | 29,3%  | 115         | 25,3%  | 95            | 23,2%  | 623               | 26,8%  | 169  | 27,2%  | 616  | 23,2%  |
| Total            | 174 | 100,0% | 455         | 100,0% | 410           | 100,0% | 2325              | 100,0% | 621  | 100,0% | 2656 | 100,0% |

**Supplemental Table 3.** Comparison of Previously Published Analysis of Coupled Alternative Splicing-NMD from Kalyna et al. (2012) with RNA-Seq Data from this Work.

Table provides information on gene identifier, primer pairs to analyze corresponding events in Kalyna et al (2012), corresponding AS event number from this work as well as minimum (Min) p-value for testing *lba1 upf3-1* versus WT and CHX versus mock treatment. "n.d." indicates that AS event was not detected in our analysis. The list includes AS events that were significantly changed in *upf1-5*, *upf3-1*, and upon CHX treatment **(A)**, in the two mutants, but not upon CHX treatment **(B)**, and AS events that were not changing upon NMD impairment **(C)** in the work from Kalyna et al. (2012).

|     | Gene             | Primer pair in Kalyna et al. | Corresponding event RNA-seq | Min p-value        |             | Comment                                                                   |
|-----|------------------|------------------------------|-----------------------------|--------------------|-------------|---------------------------------------------------------------------------|
|     |                  |                              |                             | <i>lba1 upf3-1</i> | CHX         |                                                                           |
| (A) | <i>At2g37340</i> | 21                           | 30628                       | 0.00               | 0.00        |                                                                           |
|     | <i>At3g53270</i> | 30                           | 12779-12782                 | 0.12 - 0.38        | 0.35 – 1.00 |                                                                           |
|     | <i>At5g13730</i> | 44                           | 40030                       | 0.13               | 0.52        |                                                                           |
|     | <i>At5g43910</i> | 50                           | 40714                       | 0.19               | 1.00        |                                                                           |
|     | <i>At2g04790</i> | 72                           | 17116                       | 0.25               | 1.00        |                                                                           |
|     | <i>At1g72050</i> | 110                          | 10632                       | 0.00               | 0.04        |                                                                           |
|     | <i>At2g18300</i> | 121                          | n.d.                        |                    |             |                                                                           |
|     | <i>At2g46790</i> | 125                          | 17687                       | 0.03               | 0.11        |                                                                           |
|     | <i>At3g12250</i> | 143                          | 18573                       | 0.50               | 0.24        |                                                                           |
|     | <i>At1g07350</i> | 193                          | 10781                       | 0.00               | 0.06        |                                                                           |
|     | <i>At3g49430</i> | 194                          | 12344                       | 0.00               | 0.00        | Cassette exon 4 nt shorter than described in Kalyna et al.                |
|     | <i>At2g21660</i> | 206                          | 17874                       | 0.00               | 0.07        |                                                                           |
|     | <i>At4g25500</i> | 219                          | 13065                       | 0.00               | 0.00        |                                                                           |
|     | <i>At3g55460</i> | 220                          | 12395                       | 0.00               | 0.00        |                                                                           |
|     | <i>At1g15200</i> | 224                          | 10892                       | 0.11               | 0.00        | Cassette exon detected in our analysis is shorter                         |
|     | <i>At1g07830</i> | 237                          | 14708                       | 0.03               | 0.90        |                                                                           |
|     | <i>At1g02090</i> | 241                          | 25993                       | 0.02               | 1.00        |                                                                           |
|     | <i>At5g09230</i> | 244                          | 21563                       | 0.00               | 0.04        |                                                                           |
|     | <i>At5g46110</i> | 245                          | 22040                       | 0.00               | 0.00        |                                                                           |
|     | <i>At5g63120</i> | 282                          | 23388                       | 0.14               | 0.15        |                                                                           |
|     | <i>At3g19840</i> | 285                          | 18710                       | 0.11               | 0.58        |                                                                           |
|     | <i>At5g09880</i> | 298                          | 14139                       | 0.07               | 0.00        |                                                                           |
|     | <i>At5g09790</i> | 301                          | alt 5' ss: 22650            | 0.13               | 1.00        |                                                                           |
|     |                  |                              | alt 3' ss: 39881            | 0.21               | 1.00        |                                                                           |
|     | <i>At5g65060</i> | 309                          | 39440                       | 0.27               | 0.43        |                                                                           |
|     | <i>At5g65070</i> | 310                          | n.d.                        |                    |             |                                                                           |
|     | <i>At5g59950</i> | 327                          | 8944                        | 0.05               | 0.00        |                                                                           |
|     | <i>At3g29160</i> | 344                          | 33679                       | 0.00               | 0.75        |                                                                           |
|     | <i>At1g49730</i> | 345                          | 27243                       | 0.38               | 1.00        |                                                                           |
|     | <i>At5g35410</i> | 370                          | 38353                       | 0.13               | 0.20        |                                                                           |
|     | <i>At3g20270</i> | 375                          | ---                         |                    |             | Splicing variant assignment based on description in Kalyna et al. unclear |

|     |                  |     |       |      |      |                                                                                               |
|-----|------------------|-----|-------|------|------|-----------------------------------------------------------------------------------------------|
|     | <i>At3g62190</i> | 378 | n.d.  |      |      |                                                                                               |
|     | <i>At4g02200</i> | 384 | 20195 | 0.00 | 0.93 |                                                                                               |
|     | <i>At2g26150</i> | 393 | 11480 | 0.00 | 0.17 |                                                                                               |
| (B) | <i>At1g49950</i> | 106 | n.d.  |      |      |                                                                                               |
|     | <i>At1g77080</i> | 109 | 25739 | 0.00 | 0.32 |                                                                                               |
|     | <i>At3g51880</i> | 141 | 19904 | 0.01 | 0.26 |                                                                                               |
|     | <i>At1g79880</i> | 200 | 28283 | 1.00 | 0.00 |                                                                                               |
|     | <i>At4g35785</i> | 229 | 13464 | 0.06 | 0.33 |                                                                                               |
|     | <i>At1g37150</i> | 251 | n.d.  |      |      |                                                                                               |
|     | <i>At5g43270</i> | 324 | 23091 | 0.57 | 0.20 |                                                                                               |
|     | <i>At1g76460</i> | 372 | 28021 | 0.00 | 1.00 |                                                                                               |
|     | <i>At4g36960</i> | 374 | 7092  | 0.88 | 0.06 |                                                                                               |
| (C) | <i>At2g43410</i> | 314 | 4357  | 1.00 | 1.00 | Transcript variant not expected to be NMD-sensitive; in frame intron retention                |
|     | <i>At3g06510</i> | 360 | 4588  | 0.54 | 1.00 | Transcript variant not expected to be NMD-sensitive; in frame intron retention                |
|     | <i>At1g01060</i> | 305 | 1449  | 1.00 | 0.00 | Transcript variant not expected to be NMD-sensitive; uORFs in all variants                    |
|     | <i>At2g47890</i> | 325 | 3723  | 1.00 | 1.00 | Transcript variant not expected to be NMD-sensitive; C-terminal change                        |
|     | <i>At1g27770</i> | 353 | 1994  | 0.00 | 0.01 | Cryptic intron                                                                                |
|     | <i>At4g13850</i> | 361 | n.d.  |      |      | Cryptic intron                                                                                |
|     | <i>At3g16800</i> | 332 | 31646 | 0.41 | 0.70 | Transcript variant not expected to be NMD-sensitive; alt 3'ss, in frame introduction of 18 nt |



**Supplemental Table 4.** Impact of AS on the Presence of Protein Domains for Candidate Genes from GO Terms “Signaling” and “Posttranslational Protein Modification”.

Table provides for the selected candidate genes ID, name, and TAIR description. Furthermore, domains detected by PROSITE (Sigrist et al., 2012) in SPI-encoded proteins and the position of the PTC in the corresponding SPII-derived, hypothetical protein variants are given.

| Gene ID   | Name    | TAIR description                                                                                                                                                                                | Domain position | Domain name            | Position of PTC in protein variant resulting from SPII |
|-----------|---------|-------------------------------------------------------------------------------------------------------------------------------------------------------------------------------------------------|-----------------|------------------------|--------------------------------------------------------|
| At2g46700 | CRK3    | CDPK-related kinase; involved in protein phosphorylation, N-terminal protein myristoylation                                                                                                     | aa 143-405:     | Protein kinase domain  | Stop codon at position aa 199                          |
|           |         |                                                                                                                                                                                                 | aa 446-481:     | EF-hand                |                                                        |
|           |         |                                                                                                                                                                                                 | aa 523-558:     | EF-hand                |                                                        |
| At5g20840 |         | Phosphoinositide phosphatase                                                                                                                                                                    | aa 162-551:     | SAC phosphatase domain | Stop codon at position aa 163                          |
| At3g55850 | LAF3    | Long after far red; involved in regulation of mitotic cell cycle; hydrolase activity                                                                                                            | ---             | ---                    | Stop codon at position aa 161                          |
| At3g19980 | ATFYPP3 | Flower-specific, phytochrome-associated protein phosphatase 3; negative regulation of flower development, embryo development ending in seed dormancy; subunit of Ser/Thr protein phosphatase 2A | aa 107-112:     | Ser/Thr phosphatase    | Stop codon at position aa 136                          |
| At2g42500 | PP2A-3  | Protein phosphatase 2A-3; encodes one of the catalytic subunits of protein phosphatase 2A; Ser/Thr phosphatase activity                                                                         | aa 118-123:     | Ser/Thr phosphatase    | Stop codon at position aa 169                          |
| At4g35230 | BSK1    | Brassinosteroid-signaling kinase 1; involved in protein phosphorylation, N-terminal protein myristoylation, brassinosteroid mediated signaling pathway, response to abscisic acid stimulus      | aa 76-331:      | Protein kinase domain  | Stop codon at position 282                             |

## Supplemental Experimental Methods

For adapter ligation, indices 10 and 13 were used. Final PCR enrichment was performed with half the sample volume running 14 PCR cycles. Resulting libraries were either directly subjected to Illumina sequencing (Illumina, San Diego, USA) or gel-purified. In the latter case, samples were separated on a 2% agarose TAE gel and fragments in the size range of 250 to 350 bp were extracted from the gel using MinElute columns (Qiagen).

Cluster generation was performed according to the manufacturer's instructions using a Cluster Station (Illumina) or cBot (Illumina) with reagents from TruSeq Single Read Cluster Generation Kits v5 (Illumina) or cBot Truseq Single Read Cluster Generation Kit v5 (Illumina), respectively. For sequencing, one lane per sample was used. About 800,000 raw clusters per mm<sup>2</sup> on the flow-cell surface were generated with 8 to 10pM solutions of denatured DNA. Sequencing was carried out according to the manufacturer's recommended protocols on a Genome Analyzer GAIIx (Illumina) using the TruSeq SBS Sequencing Kit v5 (36 cycle) (Illumina). Sequencing control software was SCSversion2.8 and RTA1.8.7. Sequencing runs were performed at 100 bp cycles.

## Supplemental Computational Methods

### Pre-processing of the Illumina raw data and alignment

The sequencing reads were converted to fastq file format using the SHORE pipeline version 4.1 (Ossowski et al., 2008) with standard settings under the application profile mRNA and disabled Illumina filter. The reads were subsequently aligned to the TAIR10 reference genome sequence of *A. thaliana* using the PALMapper spliced alignment tool in its most recent version 0.5 (Jean et al., 2010; <http://raetschlab.org/suppl/palmapper>). The spliced alignment was performed against the reference genome with the ability to use annotated as well as to discover new splice junctions. Junction information from the TAIR10 annotation was used for alignment. A detailed list of command line parameters is available below, the genome index as well as splice site predictions are available at: <http://www.raetschlab.org/suppl/nmd>.

To increase sensitivity, unmappable reads were allowed to be trimmed down to a length of at least 40 nts.

PALMapper command line parameters:

```
-M 6 -G 1 -E 6 -l 15 -L 25 -K 8 -C 35 -I 25000 -NI 2
-SA 100 -CT 50 -a -S
-seed-hit-cancel-threshold 10000
-report-map-read
-report-spliced-read
-report-map-region
-report-splice-sites 0.9
-filter-max-mismatches 0
```

```

-filter-max-gaps 0

-filter-splice-region 5

-qpalma-use-map-max-len 1000

-f bamn -threads 2 -polytrim 40

-qpalma-prb-offset-fix

-min-spliced-segment-len 15

-junction-remapping-coverage 5

-junction-remapping-min-spliced-segment-len 15

-junction-remapping <JUNCTION_GFF>

-score-annotated-splice-sites <JUNCTION_GFF>

-qpalma-indel-penalty 1

```

### Alignment post-processing

The alignments were sorted and indexed with SAMtools (Li et al., 2009). For further disambiguation, multiply-mapped reads were resolved using the MMR tool from the RNAseq toolbox that globally smoothes the alignment coverage based on a local variance minimization. The implementation is available from <http://www.bioweb.me/MMR>.

### Augmentation of the annotation and construction of a splicing graph

Preliminary to the annotation of alternative events, the TAIR10 annotation was transformed into a splicing graph representation, with each vertex of the graph representing an exon and each edge representing an intron connecting two exons. Based on the read evidence from the combination of all alignments, this splicing graph was augmented using the software SplAdder. For example, if the RNA-Seq alignments show a high number of reads that map to two exons that are not adjacent within any annotated transcript isoform (and thus have no connecting edge in the splicing graph), a new edge would be added to the splicing graph to represent a newly identified intron. Similar criteria are applied to add intron retentions or alternative exon ends to the splicing graph. SplAdder was used with the following confidence criteria, putting restrictions on the RNA-Seq alignments used for augmentation:

|                                                       |        |
|-------------------------------------------------------|--------|
| Maximum intron length                                 | 20,000 |
| Minimum segment length for spliced alignments         | 25     |
| Maximum number of edit operations per alignment       | 0      |
| Minimum splice junction support                       | 2      |
| Minimum intron retention coverage                     | 10     |
| Minimum relative covered position in intron retention | 0.9    |

|                                                          |     |
|----------------------------------------------------------|-----|
| Minimum relative coverage in in intron retention regions | 0.2 |
| Maximum relative coverage in in intron retention regions | 1.2 |

The remaining parameters were left in their respective default configuration. The software SplAdder is available by the authors upon request. Future versions will be integrated into the RNA-seq toolbox (<http://www.bioweb.me/rnageeq>).

### Extraction and filtering of alternative splicing events

With the splicing graph defined and augmented with SplAdder, it is straightforward to define and extract alternative splicing events. We distinguish four different AS events: exon skip (ES), intron retention (IR), alternative five prime site (A5), and alternative three prime site (A3). All events are defined on the splicing graph as follows: ES are all cycles in the graph that have length three. IR are pairs of nodes where one node start coincides with a third node's start and the other node's stop coincides with the same third node's stop. A3 (A5) are all node pairs, that share a common start (stop) and are both connected to a common third node. To clean the list of potential AS events from duplicates, all AS events were made unique on their inner event coordinates, keeping the event with the longest flanking region, e.g. if two ES events existed that contain the same cassette exon and the same introns but differ in length of the flanking exons, the longer ES event was kept for processing. An analogous procedure was applied to the remaining AS event types.

### Read counting and test for differential transcript expression

For read counting and differential testing, we used scripts implemented in the differential testing toolbox rDiff (Drewe et al., 2013, previous version in Stegle et al., 2010). To do this, each alternative event is decomposed into different sets of exonic segments supporting either one or the other isoform of the event; expression in segments that are the same in both isoforms are used for normalization but not for differential testing. Each aligned read was assigned to one of the differential segment sets resulting in a read count for each of the two isoforms. After library size normalization, a p-value for differential isoform expression was computed with a Negative Binomial test (Anders and Huber, 2010, Drewe et al., 2013). The variance function for the Negative Binomial Test describing the biological variance of the experiment was previously estimated on the two replicates of the double mutant alignments. As the replicates for each condition were sequenced in two separate sequencing runs, for each condition one replicate was taken from the first and a second one from the second sequencing run, addressing for possible (artifactual) differences between the single sequencing runs. To correct for multiple testing bias, the p-values were transformed into False Discovery Rate (FDR) values using the method of Benjamini and Hochberg (Benjamini and Hochberg, 1995). To compute a direction of the tested difference, the normalized counts for the tested condition were compared. If the counts in the second condition in a test setting condition 1 vs. condition 2 were higher, the event was called an UP event and a DOWN event otherwise. The p-value of the respective other direction was set to 1 in each case. Exonic and intronic counts were interpreted such that UP and DOWN can be read as the accumulation and depletion of the longer of both event isoforms, respectively.

### **Test for differential gene expression**

The differential gene expression was analyzed using the DESeq package for the R Bioconductor Suite (Anders and Huber, 2010). An alignment was counted for the expression of a gene, if it overlapped to at least one exonic position of this gene. To address for biological variance, the same replicates as for the differential isoform expression test have been used in DESeq.

### **Calling expressed genes**

Following the procedure used and described in Gan et al. (2011), we assumed that the number of reads per gene observed by chance follow a Poisson distribution with the probability of no mapped read per gene  $e^{-\lambda}$  with a fixed rate  $\lambda$ . Based on this model, we computed for each gene a p-value of observing the respective count value by chance. After correction for multiple testing (Benjamini and Hochberg, 1995), we chose a maximum q-value of 0.05 as cutoff for calling a gene “expressed”.

### **Ranking of the event list**

A common list of all events was ranked by the FDR value for the differential transcript expression test WT vs. *Iba1 upf3-1*. For the ranking, the minimum over both directions of the test was used. To identify significantly differential events, an FDR threshold of 0.1 (10%) was applied. See Supplemental Figure 2 online for an experimental validation of the estimated false discovery rate.

The list was further analyzed by incorporating the test results of WT vs. both single mutants individually. Then, an event was considered significantly differentially expressed and consistent with the experiment design, if it showed both an FDR less than 0.1 and one of the tests WT vs. single mutant had a p-value less than 0.1 in the same direction as the test of WT vs. *Iba1 upf3-1*. A similar combination for the test control vs. Cycloheximide (CHX) treated plants has been computed and the same FDR threshold of 0.1 was applied. Both rankings were combined into a common list “All NMD”.

### **Venn visualization and permutation test**

The events showing significant test results in several tests were visualized in Venn diagrams. All Venn diagrams were drawn in scale to the set sizes they represent. As UP and DOWN events have been combined in the diagrams, contradictory events have been removed. An event was counted as contradictory, if the different test directions resulted in different overlap assignments. To evaluate if significantly more events could be counted in the overlaps of the different tests than expected, we performed a permutation test on the ranked list, randomly permuting the p-values in both lists and counting the events in the overlap. The permutations have been repeated 50,000 times, resulting in a minimum p-value of 0.00002 ( $2 \times 10^{-5}$ ).

### **Identification of expressed intergenic loci**

We generated initial regions by searching for areas in the genome that were continuously covered by read alignments. This coverage was not only defined on exonic alignment positions but also on positions spanned by spliced reads. To initially define the regions, we did not filter the reads.

We then trimmed regions from both ends until we found read coverage greater or equal to 2. We further discarded a region if it was located within 500 nts distance of any TAIR10 annotated gene or was overlapping a repetitive region with more than 5% of its positions.

### **Differential expression of new loci**

For the remaining regions we counted the number of reads without mismatches for each of the six sets "WT", "*lba1*", "*upf3-1*", "*lba1 upf3-1*", "Mock", and "CHX", merging the respective replicates.

For each region we performed 8 directional binomial tests for increased and decreased number of read alignments in 3 WT vs. mutant pairs and "Mock" vs. "CHX". The Null hypothesis of the test was independent random assignment of reads to the different sets with a probability according to the differing total numbers of read alignments in the two sets.

We reported regions as significant, if the Bonferroni corrected p-values were smaller than 0.01.

### **Transcript identification**

For each region we ran MITIE (Behr et al., 2013) to infer transcripts. While intron boundaries are very accurately defined by spliced reads the transcription start and end sites are difficult to detect directly from RNA-seq data. We identified potential transcript boundaries based on a binomial test. The test statistic compared read-start- and read-end-counts in consecutive fixed size windows to detect transcript starts and ends, respectively. We performed the test in a sliding window approach along the complete locus. MITIE then identified potentially overlapping transcripts using the RNA-seq alignments based on mixed integer optimization. Thereby, it selects transcript such that the read coverage can be well explained in a quantitative way. Due to the very low read coverage near the true transcript ends, this approach tends to slightly underestimate the transcript length.

### **Visualization in GBrowse**

All alignments and annotation tracks have been visualized within a customized version of GBrowse2 (<http://gbrowse.cbio.mskcc.org/gb/gbrowse/NMD2013/>). Additional information display for splice junction support counts and differential testing was made available through customized GBrowse plugins. The respective tracks can be chosen via the register "Select Tracks".

### **NMD feature analysis**

To analyze for characteristic NMD features, the events have been incorporated into the representative gene models defined by the TAIR10 genome annotation. An event was integrated into the respective representative isoform, if its inner event coordinates were overlapping with at least one position to the annotated isoform. Here, the inner event coordinates describe the first exon-intron boundary after the start and the last intron-exon boundary before the end of the event. If an event was located within an intergenic region, fell completely into an intron, or event start and stop were located in different introns spanning one or several exons, the event was discarded from integration. However, only a small percentage of events had to be excluded following these criteria.

When the event could be integrated into the representative isoform, the two event isoforms were extended by the remaining exons of the representative isoform, generating two long event isoforms. Note that neither of the two long event isoforms has to be identical to the representative isoform nor to any other annotated isoform. However, many of the created isoforms have a corresponding annotated isoform.

An event was further excluded from analysis, if CDS information was not available in the annotation or both isoforms lost the annotated CDS start site. Again, only a small fraction of events had to be excluded based on that filter criterion. An overview of the number of events excluded by certain filtering criteria is provided in Supplemental Data Set 2A online.

Subsequent, each event was assigned one of the three CDS-type groups: 5' UTR, CDS, or 3' UTR. If the inner event coordinates (as defined above) overlapped to one of the UTRs it was assigned to this UTR. No event overlapped both UTRs. The remaining events were assigned to CDS.

The two isoforms of each event were assigned one of the labels "Control" and "delta ( $\Delta$ ) NMD" based on the direction of the differential test, defining the longer isoform showing an UP behavior in the test as  $\Delta$  NMD, as an accumulation upon NMD impairment was expected.

Based on the CDS-type assigned to the events, following NMD features have been evaluated:

5' UTR:

- existence of upstream open reading frame (uORF)
- uORF > 35 amino acids
- uORF overlapping annotated start codon

CDS:

- existence of premature termination codon (PTC) causing the 3' UTR to be longer than 347 nts
- splice junction more than 50 nts downstream of stop codon

3' UTR:

- 3' UTR longer than 347 nts
- splice junction more than 50 nts downstream of stop codon

To assess PTCs, we searched for the first in frame stop codon, starting at the annotated CDS start. A comparison to the annotated stop revealed the PTC. Further, we searched for upstream open reading frames (uORFs) by searching the longest ORF starting in the annotated 5' UTR in a different reading frame than the annotated CDS start.

The assessment of lengths of UTRs, uORFs and isoforms as well as the distance calculation of downstream splice junctions is straightforward.

### Event combination analysis

A possible drawback of the single event integration strategy above is the possibility, that combinations of events correct the reading frame shift and abolish the PTC introduced by a single event. To evaluate the extent of such "rescue" events, we took all significantly altered events per gene and created all possible combinations that could be integrated into the representative isoform. A



combination was deemed possible, if the alternative exonic positions of the two events were not overlapping and could thus be combined in a single isoform. The events have been integrated in a way such that the tested direction of accumulation was consistent. The generated isoforms have been analyzed in the same manner as the single integration events.

### 3' UTR length tendency estimation

For analyzing the trend of the 3' UTR length in the NMD targeted isoforms vs. the WT isoforms based on the predicted significance, all events overlapping to CDS or 3' UTR were taken into account. Based on the p-values of the directed test WT vs. *lba1 upf3-1*, all event isoforms were assigned one of the labels "Control" and " $\Delta$  NMD", asserting two different labels per event. Subsequently, the events were sorted by ascending p-value. Correlations of the 3' UTR lengths of the events were computed as rank correlation coefficients after Spearman. Significance of the correlation was inferred using the "corr" function provided in the MATLAB statistics toolbox. To visualize the tendency of 3' UTR lengths based on the p-values, the UTR lengths were smoothed by a sliding window approach, replacing each 3' UTR length with the geometric mean of its 50 successors and predecessors. All computations were done for both the "Control" and the " $\Delta$  NMD" isoforms sets independently.

### Supplemental References

- Anders, S., and Huber, W.** (2010). Differential expression analysis for sequence count data. *Genome Biol* **11**, R106.
- Behr, J., Kahles, A., Zhong, Y., Sreedharan, V.T., Drewe, P., and Rättsch, G.** (2013). MITIE: Simultaneous RNA-Seq-based transcript identification and quantification in multiple samples. *Bioinformatics*, doi: 10.1093/bioinformatics/btt442.
- Benjamini, Y., and Hochberg, Y.** (1995). Controlling the False Discovery Rate: A Practical and Powerful Approach to Multiple Testing. *Journal of the Royal Statistical Society Series B (Methodological)* **57**, 289-300.
- Carvalho, S.D., Saraiva, R., Maia, T.M., Abreu, I.A., and Duque, P.** (2012). XBAT35, a Novel Arabidopsis RING E3 Ligase Exhibiting Dual Targeting of Its Splice Isoforms, Is Involved in Ethylene-Mediated Regulation of Apical Hook Curvature. *Mol Plant* **5**, 1295-309.
- Drewe, P., Stegle, O., Hartmann, L., Kahles, A., Bohnert, R., Wachter, A., Borgwardt, K., and Rättsch, G.** (2013). Accurate detection of differential RNA processing. *Nucleic Acids Res* **41**, 5189-5198.
- Gan, X., Stegle, O., Behr, J., Steffen, J.G., Drewe, P., Hildebrand, K.L., Lyngsoe, R., Schultheiss, S.J., Osborne, E.J., Sreedharan, V.T. et al.** (2011). Multiple reference genomes and transcriptomes for Arabidopsis thaliana. *Nature* **477**, 419-423.
- Jean, G., Kahles, A., Sreedharan, V.T., De Bona, F., and Rättsch, G.** (2010). RNA-Seq read alignments with PALMapper. *Curr. Protoc. Bioinformatics* **32**: 11.6.1-11.6.37.
- Li, H., Handsaker, B., Wysoker, A., Fennell, T., Ruan, J., Homer, N., Marth, G., Abecasis, G., and Durbin, R.** (2009). The Sequence Alignment/Map format and SAMtools. *Bioinformatics* **25**, 2078-2079.

- Ossowski, S., Schneeberger, K., Clark, R.M., Lanz, C., Warthmann, N., and Weigel, D.** (2008). Sequencing of natural strains of *Arabidopsis thaliana* with short reads. *Genome Res* **18**, 2024-2033.
- Sibout, R., Sukumar, P., Hettiarachchi, C., Holm, M., Muday, G.K., and Hardtke, C.S.** (2006). Opposite root growth phenotypes of *hy5* versus *hy5 hyh* mutants correlate with increased constitutive auxin signaling. *PLoS Genet* **2**, e202.
- Sigrist, C.J.A., de Castro, E., Cerutti, L., Cucho, B.A., Hulo, N., Bridge, A., Bougueleret, L., Xenarios, I.** (2012) New and continuing developments at PROSITE. *Nucleic Acids Res* **41**, D344-7.
- Stegle, O., Drewe, P., Bohnert, R., Borgwardt, K.M., and Rätsch, G.** (2010). Statistical Tests for Detecting Differential RNA-Transcript Expression from Read Counts. *Nat. Preced.* 10.1038/npre.2010.4437.1.
